1 **Economic evaluation of caregiver interventions for children with developmental**  
2 **disabilities: a scoping review**

3 Angela Kairu<sup>1\*</sup>, Edwin Dzoro<sup>2</sup>, Vibian Angwenyi<sup>2</sup>, Charles Newton<sup>3,4</sup>, Charlotte

4 Hanlon<sup>5,6</sup>, Rosa A Hoekstra<sup>7</sup>, Amina Abubakar<sup>2,3</sup>, Edwine Barasa<sup>1,8</sup>

5 1. Health Economics Research Unit (HERU), KEMRI Wellcome Trust Research

6 Programme, Nairobi, Kenya

7 2. Aga Khan University, Institute for Human Development, Nairobi, Kenya

8 3. Neuroscience Unit, KEMRI-Wellcome Trust, Center for Geographic Medicine

9 Research Coast, Kilifi, Kenya

10 4. Department of Psychiatry, University of Oxford, Oxford, United Kingdom

11 5. Division of Psychiatry, Centre for Clinical Brain Sciences University of Edinburgh,

12 Edinburgh, United Kingdom

13 6. Department of Psychiatry, School of Medicine, College of Health Sciences, Addis

14 Ababa University, Addis Ababa, Ethiopia

15 7. Department of Psychology, Institute of Psychiatry, Psychology and Neuroscience,

16 King's College London, London, United Kingdom

17 8. Centre for Tropical Medicine and Global Health, Nuffield Department of Medicine,

18 University of Oxford, Roosevelt Drive, Oxford OX3 7LG, UK

19 \* Corresponding author

20 **NOTE:** This preprint reports new research that has not been certified by peer review and should not be used to guide clinical practice.  
Email: [akairu@kemri-wellcome.org](mailto:akairu@kemri-wellcome.org)

21 Authors' contributions

22 AK, CN, AA and EB conceptualized the study. Data was collected by AK and ED. AK and  
23 ED conducted the analysis. AK drafted the initial manuscript which was subsequently  
24 revised for important intellectual content by all authors. All authors read and approved  
25 the final manuscript.

26

## 27 **Abstract**

### 28 **Introduction**

29 Globally, families with children with developmental disabilities (DDs) may experience  
30 several challenges, including social isolation, stigma, and poverty especially in low-income  
31 settings in Africa. Most children with DDs in Africa remain unidentified and receive no  
32 formal support. Caregiver interventions focusing on education and training for carers of  
33 children with DDs have been shown to be adaptable and low intensity in implementation.  
34 However, economic evaluation evidence on caregiver interventions for DD, which is  
35 important for effective resource allocation, is limited. This review aimed to describe the  
36 nature of evidence available and methodological aspects of economic evaluations for  
37 caregiver interventions for DDs.

### 38 **Methods**

39 This scoping review employed the Arksey and O'Malley framework and aligned with the  
40 Preferred Reporting Items for Systematic Reviews and Meta-Analyses extension for  
41 Scoping Reviews (PRISMA-ScR). Seven electronic databases, grey literature and cited

42 references were systematically searched to identify eligible studies on economic  
43 evaluations of caregiver interventions for children with DDs published in 1993-2023. We  
44 assessed the quality of the included studies using the Drummond checklist. Data were  
45 systematically extracted, tabulated, and qualitatively synthesised using inductive thematic  
46 analysis.

## 47 **Results**

48 The searches yielded 7811 articles. Seventeen studies all in high-income countries met the  
49 inclusion criteria which focused on caregiver interventions for autism spectrum disorder  
50 (n=7), attention deficit hyperactivity disorder (ADHD) (n=6), disruptive behaviour and  
51 behaviour problems with ADHD (n=5), intellectual disabilities (n=1) and language delay  
52 (n=1).

53 The most used economic evaluation approach was trial based models (n=14), followed by  
54 decision analytic models (n=5)). The methods were not explicitly stated in 1 study.  
55 Economic evaluation analyses included cost effectiveness (n=11), costing (n=3), cost utility  
56 (n=2), cost consequence (n=1) cost benefit (n=1), and combined analyses (n=2). Nine studies  
57 reported the interventions as cost effective, five studies reported the intervention to be cost  
58 saving, and one identified caregiver costs as a cost driver. The main identified  
59 methodological challenges were related to costing, outcome measurement in children and  
60 the appropriate time horizon for modelling.

## 61 **Conclusion**

62 Caregiver interventions demonstrate cost-effectiveness, with the available evidence  
63 supporting the adoption of the interventions evaluated. Caregiver interventions are a  
64 promising avenue to strengthen access and reduce costs associated with health services for  
65 children with DDs. Additionally, this review identified key methodological challenges and  
66 highlighted areas for further research to address these limitations. Prioritizing more  
67 economic evaluation studies in this area would inform decision-making on efficient  
68 resource allocation, promote inclusivity and equitable access to services for children with  
69 DDs.

70 **Key words:** developmental disabilities, caregiver interventions, economic evaluation,  
71 scoping review

72

73

74

75

76

77

78

79

80

## 81 Introduction

82 Developmental disabilities (DDs) are a heterogenous group of conditions characterized by  
83 impairments that affect a child's physical, learning, or behavioural functioning (1).  
84 Globally, 53 million children under the age of 5 years have DDs such as sensory  
85 impairment, intellectual disability, epilepsy, and autism spectrum disorder (ASD) (2). With  
86 the lack of improvement of the global burden of developmental disabilities over the last  
87 three decades (2), the socioemotional consequences, academic challenges and economic  
88 cost to society will be sustained or may worsen over time (3). More specific to DDs,  
89 neurodevelopmental disorders (NDDs) occur in the developmental period and induce  
90 deficits that produce impairments of functioning (personal, academic, occupational or  
91 social) (4). They include intellectual disability (ID); ASD; Attention-Deficit/Hyperactivity  
92 Disorder (ADHD); communication disorders; neurodevelopmental motor disorders; and  
93 specific learning disorders (4). The prevalence of NDDs have rarely been assessed as a  
94 whole, with existing literature highlighting multimorbidity as a norm (3). The mmajority  
95 of children with DDs lack access to care especially in Africa, due to inadequate capacity of  
96 skilled human resource (5, 6). With focus on NDDs, substantial evidence shows that parents  
97 can learn skills to effectively improve their child's development and positive behaviour (7).  
98 Caregiver-focused interventions have been developed to train and educate parents/carers  
99 of children with developmental disabilities to support them in their child's development  
100 (8). Caregiver interventions are often centred on increasing parental responsiveness to  
101 improve the child's behaviour and communication outcomes (9-12). Parent skills training  
102 models have shown to be low-intensity interventions due to less practitioner time

103 requirement, and the narrower focus of parenting strategies, and are adaptable for clinic,  
104 home, groups or individuals (13, 14). Further, interventions in early childhood are shown  
105 to have the strongest impact on improving the child's long-term outcomes and parent  
106 outcomes (10-12). Therefore, the need to explore the childhood specific strategies is  
107 important to reduce the overall economic burden of the illness. As such, the use of  
108 economic evaluations on mental health interventions and strategies has steadily gained  
109 interest. The economic evaluation data provides policy makers with information on the  
110 best value for money for the interventions (15). Within resource constraints, it is important  
111 that health interventions are effective in reducing the burden of disease. Economic  
112 evaluations can provide this information, and it is important to assess the current scope of  
113 evaluations of child specific interventions to inform future policy decisions.

114 Economic evaluation is an approach that contributes evidence on the economic costs and  
115 outcomes of health interventions to inform efficient resource allocation within a budget  
116 constraint. (16). Policy strategies to decrease the impact of mental disorders are optimally  
117 effective when they are informed by evidence that determines how to improve efficacy,  
118 efficiency and cost-effectiveness of interventions, and their translation into clinical  
119 practice (17). With a goal of maximizing health and well-being, economic analyses are  
120 needed alongside effectiveness evidence for policy makers to identify the best options for  
121 mental health resources (18). Costs and cost-effectiveness data for caregiver interventions  
122 for children with DDs is scarce. Lamsal et al (2017) highlight few economic evaluations  
123 have been conducted to value interventions for children with NDDs resulting from  
124 challenges in applying economic evaluation methodologies for this heterogenous

125 population (1). Further a review by Kularatna et al (2022) identified twelve model based  
126 economic evaluations for care for NDDs, however none modelled the impact on families  
127 and caregiver (19).

128 For childhood intervention programmes, some of the methodological challenges are related  
129 to cost and outcome measurement and valuation, the requirements for sensitivity analyses,  
130 the decision rules adopted by decision makers and the interpretation of results considering  
131 contextual factors (20, 21). Given these factors, there is a notable gap in literature that  
132 provides an overview of economic evaluations for caregiver interventions for children with  
133 DDs. The aim of this scoping review is to map the body of literature and describe the nature  
134 of evidence available on the economic evaluations for caregiver interventions for NDDs.  
135 Additionally, the review appraised the quality of studies included and discussed their  
136 methodological challenges and ways to mitigate them. By outlining the available evidence,  
137 we aim to inform the paediatric economic evaluation methodological approaches utilized  
138 and associated challenges and build on existing literature on interventions for child and  
139 adolescent mental healthcare.

140

## 141 **Methods**

142 We applied the scoping review approach proposed by Arksey and O'Malley (22), and  
143 adhered to the Preferred Reporting Items for Systematic Reviews and Meta-Analyses  
144 extension for Scoping Reviews (PRISMA-ScR) guidelines for reporting this review. The  
145 review protocol was uploaded to Open Science Framework (OSF) <https://osf.io/ymwr2>.

## 146 Search strategy and selection criteria

147 An extensive literature search was conducted using electronic databases that included  
148 PubMed, PsycINFO, Web of Science, the International Network of Agencies for Health  
149 Technology Assessment (INAHTA), Paediatric Economic Database Evaluation (PEDE),  
150 CINAHL, Econ Lit through EBSCO from January 1993 to December 2023. Further, we  
151 searched databases of grey literature specifically google scholar, and references of the  
152 included studies. The final search was conducted on September 18<sup>th</sup>, 2024. The search terms  
153 used in all search strategies were categorized into 4 blocks including: i) caregiver (parent,  
154 family); ii) interventions (e.g. training, programme, groups); iii) neurodevelopmental  
155 disorders (e.g. autism, intellectual disability); and iv) economic evaluation (e.g. cost utility  
156 analysis and cost effectiveness analysis). The details of the search concepts can be obtained  
157 from S1 and S2 Tables. All citations were imported into an electronic database (Endnote  
158 version X8) (23), where duplicates were removed. Studies were then uploaded into Rayyan  
159 (<https://www.rayyan.ai/>) for title and abstract screening. The inclusion criteria comprised  
160 of empirical studies that reported on an economic evaluation with a focus on caregiver  
161 interventions for neurodevelopmental disorders (see Table 1), in all geographical locations  
162 as summarized in Table 1. Studies that focused on physical and sensory impairments in  
163 children and studies that did not report on economic evaluation models of caregiver  
164 interventions for NDDs were excluded. Further, studies published beyond the time frame,  
165 were reviews, and in languages other than English were also excluded. The reason for  
166 exclusion of each study were noted. Two reviewers (AK and ED) independently screened  
167 titles and abstracts to assess relevance based on inclusion and exclusion criteria (Table 1).



168 A third reviewer (EB) resolved any variations established. Abstracts included were then  
169 assessed for full-text inclusion. Full text articles eligible for inclusion were then selected  
170 for data extraction.

171

172 Table 1: Inclusion and exclusion criteria summary

| <b>Inclusion criteria</b>                                                                                                                                                                                                                                                                                                                                                                                                                                                                              | <b>Exclusion criteria</b>                                                                                                                                                                                                                                                                                                                                                                                                                      |
|--------------------------------------------------------------------------------------------------------------------------------------------------------------------------------------------------------------------------------------------------------------------------------------------------------------------------------------------------------------------------------------------------------------------------------------------------------------------------------------------------------|------------------------------------------------------------------------------------------------------------------------------------------------------------------------------------------------------------------------------------------------------------------------------------------------------------------------------------------------------------------------------------------------------------------------------------------------|
| <ol style="list-style-type: none"><li>1. Studies on economic evaluation of caregiver interventions for NDDs.</li><li>2. Studies reporting on economic outcome measures for caregivers and/or children with DDs.</li><li>3. NDDs: impairments in social communication domains including autism spectrum disorder (ASD), attention deficit hyperactivity disorder (ADHD), intellectual disabilities, language communication disorders.</li><li>4. All countries.</li><li>5. Empirical studies.</li></ol> | <ol style="list-style-type: none"><li>1. Studies that did not report economic evaluations of caregiver interventions for NDDs.</li><li>2. Studies not reporting on economic outcome measures for caregivers and/or children with DDs.</li><li>3. DDs: impairments: physical and sensory impairments.</li><li>4. Studies for interventions for caregivers of adults with disabilities</li><li>5. Any reviews of economic evaluations.</li></ol> |

173

## 174 Data extraction

175 The data was extracted using a tailored Microsoft Excel worksheet and summarized in a  
176 narrative format: author/year, country, setting, population, type of DD, study design,  
177 intervention, comparator, and the economic evaluation methods reported guided by the  
178 Consolidated Health Economic Evaluation Reporting Standards (CHEERS) checklist (24),  
179 and the Gates Reference Case for Economic Evaluations (25). The detailed CHEERS  
180 checklist and Gates Reference Case are available in S3 Table. The extraction sheet was  
181 piloted for completeness using five sample studies. Data extraction was undertaken by AK  
182 and ED. Discrepancies in the study selection and data extraction were resolved through  
183 discussion between two reviewers (AK, ED) and a third reviewer (EB).

## 184 Data synthesis

185 Economic findings were synthesised and presented as a narrative summary in conjunction  
186 with a tabular summary. Our synthesis focused on how each economic evaluation has been  
187 described in the papers and summarized the results of the studies and methodological  
188 challenges encountered in economic evaluations of caregiver interventions for children  
189 with DDs.

## 190 Quality assessment

191 The quality of the included economic evaluations was rated using the Drummond 10-point  
192 checklist (26). The checklist guides on the critique of economic evaluations by considering:  
193 1) the research question; 2) the study/intervention description; 3) the study design; 4) the  
194 identification, 5) measurement, and 6) valuation of costs and consequences; 7) application

195 of discounting; 8) incremental analysis; 9) clear presentation of results with uncertainty  
196 and sensitivity analyses; and 10) discussion of results in the context of policy relevance and  
197 existing literature. Based on this, the studies were rated using a scale developed by Doran  
198 (27) with a potential score of 1 to each of the checklist items. The aggregate scores reflected  
199 an economic appraisal of poor quality (scores 1 to 3), average quality (scores 4 to 7) and  
200 good quality (scores 8 to 10). Authors AK and ED conducted independent quality appraisal  
201 of the included studies.

## 202 Results

### 203 Article selection

204 The literature search identified 7,811 articles. After excluding duplicate studies, 7,255  
205 studies remained for title and abstract screening. The screening based on title and abstract  
206 resulted in 38 articles eligible for full text screening. Most studies were excluded because  
207 they included a clinical condition with no NDD, they were not primary studies reporting  
208 economic evaluations results (e.g. reviews) or focused on clinical treatment rather than  
209 caregiver interventions for children with NDDs. After full-text screening, 17 studies were  
210 included for data extraction and quality assessment. Additional details are presented in the  
211 PRISMA flow diagram (Figure 1).

212 Figure 1: PRISMA flow chart of the study selection process

213

## 214 Quality assessment

215 Most studies were classified as good quality (n=16) (28-40) and four studies were classified  
216 as average (41-44). The most common reason for studies not receiving full points was due  
217 to lack of inclusion of discounting (n=12) (28, 29, 32, 34, 35, 37, 40-45) and unclear  
218 presentation and discussion of results (n=3) (31, 43, 44). Details of quality scores for each  
219 study is presented in S4 Table.

220

## 221 Overview of key characteristics

222 All the studies included were conducted in high income countries specifically UK (n=7),  
223 Canada (n = 2), United States (n=3), Australia (n=1), Denmark (n=1), Sweden (n=3), Ireland  
224 (n=1), Japan (n=1), and multi-country (England, Ireland, Italy, Spain) (n=1). Most of the  
225 studies focused on caregiver interventions for children with autism spectrum disorder  
226 (n=7), followed by attention deficit hyperactivity disorder (ADHD) (n=6), disruptive  
227 behaviour with ADHD (n=2), behavioural problems with ADHD (n=3), intellectual  
228 disabilities (n=1) and language delay (n=1). The caregiver interventions were delivered  
229 through group format (n=9), on individual basis (n=8) or both platforms (n=1). Two of the  
230 studies did not report on the intervention delivery method. Overall, the caregiver  
231 interventions targeted children ranging from 12 months to 12 years.

232 Of the reviewed studies, eleven reported a cost effectiveness analysis (CEA) (28, 29, 31, 32,  
233 35, 37, 38, 40, 41, 46, 47), two studies carried out a cost utility analysis (CUA) (33, 44), one  
234 study performed a cost consequence analysis (48) and one study conducted a cost benefit

235 analysis (CBA) (36). However, two studies reported as CEAs (31, 38) were CUAs based on  
236 the measure of outcome as quality adjusted life years (QALYs) and one study conducted an  
237 additional CUA (46). In addition to these, two studies conducted combined analyses as a  
238 cost analysis alongside a CEA (30), and a cost consequence analysis (CCA) alongside a CEA  
239 (39). For partial economic evaluations, three studies conducted a costing analysis (34, 42,  
240 43). Fourteen were economic evaluations conducted alongside trials (28, 29, 31, 32, 34, 38-  
241 44, 46, 47), whereas five studies were model based (30, 33, 36, 37, 48). One study did not  
242 state the economic evaluation approach used (35). The time horizon for the majority of  
243 studies was relatively short, that is: 13 weeks for one study (41); six to ten months for three  
244 studies (29, 34, 42); and, one year for two studies (32, 46). Eight studies extrapolated to a  
245 long-term period ranging from two years to 65 years (30, 33, 35-39, 48). Six studies (28, 31,  
246 40, 43, 44, 47) did not explicitly state the time horizon of the evaluations. In Table 2 we  
247 provide a detailed overview of the main characteristics of the included studies.

Table 2: Overview of the key characteristics of the included economic evaluation studies

| Author & year              | Developmental disability                        | Country        | Study population (age group) | Study design (Model type)               | Type of economic evaluation                   | Follow-up period (trials) or time horizon (models) |
|----------------------------|-------------------------------------------------|----------------|------------------------------|-----------------------------------------|-----------------------------------------------|----------------------------------------------------|
| Scavenius et al (28), 2020 | Attention-deficit hyperactivity disorder (ADHD) | Denmark        | 3 to 9 years                 | Randomized controlled trial             | Cost effectiveness analysis                   | Not reported                                       |
| Sayal et al (29), 2016     | Attention-deficit hyperactivity disorder (ADHD) | United Kingdom | 4 to 8 years                 | Three arm randomized cluster trial      | Cost effectiveness analysis                   | 9 months (inferred)                                |
| Segal et al (30), 2023     | Autism Spectrum Disorder                        | Australia      | 12 months                    | Decision analytic model (Decision tree) | Cost analysis and Cost-effectiveness analysis | 12 years                                           |

|                               |                                                 |                |                                      |                                                       |                                                                 |              |
|-------------------------------|-------------------------------------------------|----------------|--------------------------------------|-------------------------------------------------------|-----------------------------------------------------------------|--------------|
| Sonuga-Barke et al (44), 2017 | Attention-deficit hyperactivity disorder (ADHD) | United Kingdom | 2 years 9 months to 4 years 6 months | Multi-centre three-arm parallel randomised controlled | Cost analysis (initially planned to do a cost utility analysis) | Not reported |
| Charman et al (31), 2021      | Autism Spectrum Disorder                        | United Kingdom | 4 to 8.11 years                      | Randomized controlled trial                           | Cost effectiveness analysis                                     | Not reported |
| Byford et al (32), 2015       | Autism Spectrum Disorder                        | United Kingdom | 2 to 4 years 11 months               | Multi centre randomised controlled trial              | Cost effectiveness analysis                                     | 13 months    |
| Nystrand et al (33), 2019     | Behaviour problems (conduct disorder and ADHD)  | Sweden         | 5 to 12 years                        | Decision analytic model (Markov)                      | Cost utility analysis                                           | 18 years     |
| Tsiplova et al (34), 2022     | Autism Spectrum Disorder                        | Canada         | 15 to 36 months                      | Randomized comparative effectiveness trial            | Cost analysis                                                   | 24 weeks     |
| Kuklinski et al (35), 2023    | Disruptive behaviour (ADHD)                     | United States  | Not reported                         | Economic evaluation                                   | Cost effectiveness analysis                                     | 5 years      |

|                              |                                                 |               |                 |                                         |                             |           |
|------------------------------|-------------------------------------------------|---------------|-----------------|-----------------------------------------|-----------------------------|-----------|
|                              | and conduct disorder)                           |               |                 |                                         |                             |           |
| Nystrand et al (36),<br>2019 | Behaviour problems (conduct disorder and ADHD)  | Sweden        | 5 to 12 years   | Decision analytic model (Markov)        | Cost benefit analysis       | 2 years   |
| Tran et al (41),<br>2018     | Attention-deficit hyperactivity disorder (ADHD) | United States | 7 to 11 years   | Randomized controlled trial             | Cost effectiveness analysis | 13 weeks  |
| Page et al (42),<br>2016     | Attention-deficit hyperactivity disorder (ADHD) | United States | 5 to 12 years   | Randomized controlled trial             | Cost analysis               | 10 months |
| Penner et al (37),<br>2015   | Autism Spectrum Disorder                        | Canada        | 15 to 36 months | Decision analytic model (Decision tree) | Cost effectiveness analysis | 65 years  |
| Nystrand et al (38),<br>2020 | Disruptive behaviour                            | Sweden        | 8 to 12 years   | Randomized controlled trial             | Cost effectiveness analysis | 2 years   |



|                                |                              |                                                         |                                 |                                         |                                                               |                                                                                |
|--------------------------------|------------------------------|---------------------------------------------------------|---------------------------------|-----------------------------------------|---------------------------------------------------------------|--------------------------------------------------------------------------------|
| Ferguson et al (43),<br>2022   | Autism Spectrum<br>Disorder  | Ireland                                                 | 2 to 6 years                    | Experimental research<br>design (trial) | Cost analysis                                                 | Not reported                                                                   |
| O'Farrelly et al<br>(39), 2021 | Behaviour problems           | United<br>Kingdom                                       | 12 to 36 months                 | Randomised controlled<br>trial          | Cost effectiveness<br>analysis; cost<br>consequence analysis  | Short term analysis<br>24 months; Long<br>term analysis<br>beyond trial period |
| Gibbard et al (40),<br>2004    | Language delay               | United<br>Kingdom                                       | 22 to 36 months                 | Randomised controlled<br>trial          | Cost effectiveness<br>analysis                                | Not reported                                                                   |
| Royston et al (46)             | Intellectual<br>disabilities | United<br>Kingdom                                       | 30 to 59 months                 | Randomised controlled<br>trial          | Cost effectiveness<br>analysis (and cost<br>utility analysis) | 12 months                                                                      |
| Tinelli et al (48)             | Autism Spectrum<br>Disorder  | Multi-country<br>(England,<br>Ireland, Italy,<br>Spain) | 2 years to 4 years 11<br>months | Economic evaluation                     | Cost consequence<br>analysis                                  | 6 years                                                                        |

|                           |                                                       |       |               |                                |                                |              |
|---------------------------|-------------------------------------------------------|-------|---------------|--------------------------------|--------------------------------|--------------|
| Shimabukuro et al<br>(47) | Attention-deficit<br>hyperactivity<br>disorder (ADHD) | Japan | 6 to 12 years | Randomised controlled<br>trial | Cost effectiveness<br>analysis | Not reported |
|---------------------------|-------------------------------------------------------|-------|---------------|--------------------------------|--------------------------------|--------------|

## 248 Economic evaluation methods

### 249 Cost estimates

250 We summarized the cost estimates associated with caregiver interventions implementation  
251 and the associated healthcare costs for children with DDs. Nine studies conducted  
252 evaluations from one perspective only: four studies adopted a health provider's perspective  
253 (28, 33, 35, 43); two studies adopted a government (insurer) payer perspective (30, 39); and  
254 three studies adopted a societal perspective (38, 40, 41). Nine studies reported results from  
255 more than one perspective (31, 32, 34, 37, 40, 44, 46-48). The remaining two studies did  
256 not explicitly state the perspective adopted (36, 42).

257 The health provider costs mainly reported on the intervention implementation costs, for  
258 instance training, personnel, overheads, treatment costs amongst others. Among these, only  
259 three studies (28, 35, 46) reported on both start-up and implementation costs of the  
260 caregiver interventions. Notably, Scavenius et al (2020) reported only financial costs and  
261 excluded opportunity costs such as income loss or other sector benefits, as they were not  
262 tangible costs of the intervention implementation (28). Cost inclusion or exclusion may  
263 impact the study results by increasing the costs of the intervention, but at the same time  
264 may also reduce the incremental costs of the intervention. Four studies (33, 36, 44, 46)  
265 captured the costs of other sectors i.e. education, social and crime services. Furthermore,  
266 Nystrand et al (2019; 2020) included cost offsets as the treatment costs avoided with the  
267 reduction of the disease prevalence incurred by the health sector as a cost input (33, 36).  
268 For societal costs, four studies (37, 38, 46, 47) mainly included either direct costs (health

269 service costs, medication, childcare, travel) or indirect costs (productivity loss), whereas  
270 eight studies (29, 31, 32, 34, 40, 41, 44, 48) comprehensively captured both direct and  
271 indirect costs. Most studies explicitly stated the currency and reported year used except six  
272 studies (29, 31, 32, 42-44). Discounting was not necessary in the studies which collected  
273 costs over a one-year time horizon or less. However, where necessary due to a longer time  
274 horizon adopted by twelve of the included studies, a discount rate ranging from 2% to 6%  
275 per annum was applied with the exception of two studies (35, 37). Therefore, the cost-  
276 effectiveness results reported may be inaccurate for both studies.

## 277 Health outcome measures

278 We report key effectiveness outcomes of caregiver interventions and comparators in the  
279 eligible studies in Table 4. Except for the cost analysis, the most frequently reported health  
280 outcomes for cost utility analysis included four studies reporting on QALYs (29, 31, 38, 46),  
281 and one study studies on disability adjusted life years (DALYs) (33). Of the studies that  
282 reported QALYs, the generic health related quality of life (HRQoL) measures used were  
283 Child Health Utility 9D (CHU-9D) and EuroQoL 5 dimensions Youth (EQ5D-Y). Health  
284 outcomes reported in 9 studies applying cost effectiveness analysis were mostly per case  
285 reduction and per outcome score improvement amongst others (28, 30, 32, 35, 39-41, 46,  
286 47). O'Farrelly et al (2021) carried out a short term CEA and a long term CUA, but with  
287 the small differences in the QALYs and no difference in cost between the trial groups, only  
288 the short term CEA was reported with per outcome score improvement as the health  
289 outcome (39). Further, Penner et al (2015) reported dependency-free life years (DFLYs) as  
290 the outcome measure (37), while Nystrand et al (2020) reported the net present value for

291 the CBA (36). Additional details included in each of the reviewed studies are listed in Table

292 3.

293

294

295

296

297

298

299

300

301

Table 3: Cost inputs associated with the caregiver interventions included in this review

| Study                | Intervention(s)                            | Study perspective | Cost components                                                                                                                                                                                                                                                                                                                                                                                                                                       | Currency and year   | Discount rate |
|----------------------|--------------------------------------------|-------------------|-------------------------------------------------------------------------------------------------------------------------------------------------------------------------------------------------------------------------------------------------------------------------------------------------------------------------------------------------------------------------------------------------------------------------------------------------------|---------------------|---------------|
| Scavenius et al (28) | CiC <sup>c</sup> is a manual-based program | Provider          | <ul style="list-style-type: none"> <li>• Non-recurrent initial costs associated with CiC<sup>c</sup> program development.</li> <li>• Intervention setup costs: recruiting and educating volunteer trainers.</li> <li>• Intervention running costs: venue rental, volunteers' mileage, child minding services, supervision.</li> <li>• Participants costs: Time-use (commuting time, training time)</li> <li>• Opportunity costs (excluded)</li> </ul> | Danish Kroner, 2015 | Not reported  |
| Sayal et al (29)     | Parent only                                | Societal          | <ul style="list-style-type: none"> <li>• Intervention costs: training, overheads</li> </ul>                                                                                                                                                                                                                                                                                                                                                           | Sterling Pounds     | None          |

|                         |                                                                                                |                               |                                                                                                                                                                                                                                                                                                                                                                                                                                 |                              |              |
|-------------------------|------------------------------------------------------------------------------------------------|-------------------------------|---------------------------------------------------------------------------------------------------------------------------------------------------------------------------------------------------------------------------------------------------------------------------------------------------------------------------------------------------------------------------------------------------------------------------------|------------------------------|--------------|
|                         | intervention<br>Combined parent-<br>teacher intervention                                       |                               | and consumables, personnel costs<br><ul style="list-style-type: none"><li>• Productivity loss costs</li></ul>                                                                                                                                                                                                                                                                                                                   | (year not<br>reported)       |              |
| Segal et al (30)        | iBASIS–Video<br>Interaction to<br>Promote Positive<br>Parenting (iBASIS-<br>VIPP) intervention | Government<br>(insurer)       | <ul style="list-style-type: none"><li>• Intervention costs: therapy, direct travel, therapy-related administration, and training and supervision.</li><li>• Treatment as usual: group sessions, therapy (occupational, physiotherapy, speech), paediatrician, psychologist.</li><li>• Expected downstream support costs funds to eligible participants to access a wide range of disability-related support services.</li></ul> | Australian<br>Dollars, 2023  | 3%           |
| Sonuga-Barke et al (44) | New Forst Parenting<br>Programme (NFPP)                                                        | Societal and NHS <sup>a</sup> | <ul style="list-style-type: none"><li>• Service-related costs: care service use (health clinics, health visitors, GPs,</li></ul>                                                                                                                                                                                                                                                                                                | Sterling Pounds<br>(year not | Not reported |

|               |                      |                               |                                                                                                                                                                                                                                                                                                                                                                                                                                                                                                                                                  |                 |              |
|---------------|----------------------|-------------------------------|--------------------------------------------------------------------------------------------------------------------------------------------------------------------------------------------------------------------------------------------------------------------------------------------------------------------------------------------------------------------------------------------------------------------------------------------------------------------------------------------------------------------------------------------------|-----------------|--------------|
|               |                      |                               | <p>paediatric and mental health services);<br/> extra educational provision (school<br/> nurses, educational psychologist); social<br/> services</p> <ul style="list-style-type: none"> <li>• Non-service-related costs: parental time<br/> off work</li> <li>• Direct non recurrent costs: course fees/<br/> training</li> <li>• Recurrent costs: material, preparation,<br/> supervision, therapist travel,<br/> administration, parent travel, creche,<br/> delivery</li> <li>• Indirect costs: health services, family<br/> borne</li> </ul> | reported)       |              |
| Charman et al | Predictive Parenting | NHS <sup>a</sup> and personal | <ul style="list-style-type: none"> <li>• Intervention costs: administration and</li> </ul>                                                                                                                                                                                                                                                                                                                                                                                                                                                       | Sterling Pounds | Not reported |



|                   |                                               |                                                  |                                                                                                                                                                                                                                                                                                                                                                                                            |                                        |      |
|-------------------|-----------------------------------------------|--------------------------------------------------|------------------------------------------------------------------------------------------------------------------------------------------------------------------------------------------------------------------------------------------------------------------------------------------------------------------------------------------------------------------------------------------------------------|----------------------------------------|------|
| (31)              | intervention                                  | social service,<br>public sector and<br>societal | <p>travel expenses.</p> <ul style="list-style-type: none"> <li>• Service-related costs: salaries, overheads, medication</li> <li>• Indirect costs: unpaid parent and carer support</li> </ul>                                                                                                                                                                                                              | (year not reported)                    |      |
| Byford et al (32) | Pre-school Autism<br>Communication<br>therapy | Societal and public<br>sector                    | <ul style="list-style-type: none"> <li>• Direct costs: schooling and childcare costs, parental out of pocket expenditure (aids and adaptations to the home, training courses etc.).</li> <li>• Indirect costs: productivity losses (time off work due to child's autism) and informal (unpaid) care.</li> <li>• Intervention costs: therapists salaries, overheads (capital, administrative and</li> </ul> | Sterling Pounds<br>(year not reported) | None |

|                        |                                                                                                |                           |                                                                                                                                                                                                                                                                                                   |                             |      |
|------------------------|------------------------------------------------------------------------------------------------|---------------------------|---------------------------------------------------------------------------------------------------------------------------------------------------------------------------------------------------------------------------------------------------------------------------------------------------|-----------------------------|------|
|                        |                                                                                                |                           | managerial), supervision, travel costs to home visits.                                                                                                                                                                                                                                            |                             |      |
| Nystrand et al<br>(33) | COPE Connect intervention.<br><br>Comet intervention<br><br>Incredible Years (IY) intervention | Provider                  | <ul style="list-style-type: none"> <li>• Training costs (training fees, practitioner allowance, hotel cost, trip cost, travel allowance); session running costs (practitioners cost, venue cost, materials, annual license fees)</li> <li>• Cost offsets: health and education sectors</li> </ul> | United States Dollars, 2015 | 3%   |
| Tsiplova et al<br>(34) | Parenting coaching intervention                                                                | Public payer and societal | <ul style="list-style-type: none"> <li>• Training facilitators time costs, coach labour time costs, medical specialist services, laboratory tests, out of pocket costs to parents, private provider costs reimbursed by insurance.</li> <li>• Productivity loss.</li> </ul>                       | Canadian Dollars, 2019      | None |

|                         |                                                                     |              |                                                                                                                                                                                                                                                                                                                                                                                                |                                |              |
|-------------------------|---------------------------------------------------------------------|--------------|------------------------------------------------------------------------------------------------------------------------------------------------------------------------------------------------------------------------------------------------------------------------------------------------------------------------------------------------------------------------------------------------|--------------------------------|--------------|
| Kuklinski et al<br>(35) | First Step Next (FSN) intervention                                  | Provider     | <ul style="list-style-type: none"> <li>• Personnel costs, supplies (pre-intervention: teacher recruitment packets, student screening kits, student screening surveys.</li> <li>• Intervention costs: manuals, timers, and supplemental books, food and snacks:</li> <li>• Implementation support costs: the manual, a Jenga game, and an iPad.), overheads (20% of personnel costs)</li> </ul> | United States<br>Dollars, 2018 | Not reported |
| Nystrand et al<br>(36)  | Parent training programmes (COPE, Comet, Incredible Years, Connect) | Not reported | <ul style="list-style-type: none"> <li>• Intervention costs (training costs, travel cost for training, session running costs, annual license fees)</li> <li>• Cost offsets i.e. healthcare sector costs, education sector costs (in the form of</li> </ul>                                                                                                                                     | Euros, 2015                    | 3%           |

|                   |                                                                                   |                               |                                                                                                                                                                                                                                  |                                           |              |
|-------------------|-----------------------------------------------------------------------------------|-------------------------------|----------------------------------------------------------------------------------------------------------------------------------------------------------------------------------------------------------------------------------|-------------------------------------------|--------------|
|                   |                                                                                   |                               | assistants, smaller group sessions and special pedagogical support)                                                                                                                                                              |                                           |              |
| Tran et al (41)   | Child Life and Attention Skills (CLAS) program and parent-focused treatment (PFT) | Societal                      | <ul style="list-style-type: none"> <li>• Direct costs: personnel salaries and supplies</li> <li>• Indirect costs: clinician travel time, parent and clinician time spent at training sessions, and parent time spent.</li> </ul> | United States Dollars, 2011               | None         |
| Page et al (42)   | Group behavioral parent training                                                  | Not reported                  | <ul style="list-style-type: none"> <li>• Intervention direct costs: medication, personnel (physician, clinician, paraprofessional, teacher), fuel reimbursement.</li> <li>• Indirect costs: parent's time.</li> </ul>            | United States Dollars (year not reported) | None         |
| Penner et al (37) | Parent delivered Early Start Denver Model (ESDM)                                  | Government payer and societal | <ul style="list-style-type: none"> <li>• Intervention costs (therapist, training cost),</li> </ul>                                                                                                                               | Canadian Dollars, 2013                    | Not reported |

|                        |                                                  |          |                                                                                                                                                                                                                                 |                                           |              |
|------------------------|--------------------------------------------------|----------|---------------------------------------------------------------------------------------------------------------------------------------------------------------------------------------------------------------------------------|-------------------------------------------|--------------|
|                        |                                                  |          | <ul style="list-style-type: none"> <li>• Provincial costs (special education services, disability program costs, vocational training, health service costs)</li> <li>• Caregiver costs (excluding productivity loss)</li> </ul> |                                           |              |
| Nystrand et al<br>(38) | Parent management<br>Training (PMT)<br>programme | Societal | <ul style="list-style-type: none"> <li>• Intervention costs: training cost, delivery cost (meetings/ sessions, material and venue costs, medication, special education services).</li> </ul>                                    | Swedish Krona,<br>2018                    | 3%           |
| Ferguson et al<br>(43) | ABA- based parent<br>training                    | Provider | <ul style="list-style-type: none"> <li>• Cost of purchasing and shipping the hardware, cost of BCBA® direct “in session time”, cost of BCBA® indirect data collection time</li> </ul>                                           | Sterling Pounds<br>(year not<br>reported) | Not reported |

|                          |                                                                                                                                 |                  |                                                                                                                                                                                                                                                                                                                                                                                                                                                                                         |                          |      |
|--------------------------|---------------------------------------------------------------------------------------------------------------------------------|------------------|-----------------------------------------------------------------------------------------------------------------------------------------------------------------------------------------------------------------------------------------------------------------------------------------------------------------------------------------------------------------------------------------------------------------------------------------------------------------------------------------|--------------------------|------|
|                          |                                                                                                                                 |                  | <ul style="list-style-type: none"> <li>• Face-to-face project costs: cost of travel, indirect cost of travel time of BCBA®, cost of BCBA® direct “in session time”</li> </ul>                                                                                                                                                                                                                                                                                                           |                          |      |
| O’Farrelly et al<br>(39) | Video-feedback<br><br>Intervention to<br><br>promote Positive<br><br>Parenting and<br><br>Sensitive Discipline<br><br>(VIPP-SD) | NHS <sup>a</sup> | <ul style="list-style-type: none"> <li>• Service-related costs: accommodation (e.g. foster care and supported housing), hospital services (e.g. inpatient stays, outpatient contacts, accident and emergency attendances), community-based health and social care services (e.g. contacts with GPs and clinical psychologists), and prescribed medication.</li> <li>• Cost of delivering VIPP-SD: therapist salaries, training, supervision, equipment, on-costs (employers’</li> </ul> | Sterling Pounds,<br>2018 | 3.5% |

|                       |                                           |                               |                                                                                                                                                                                                                                                                                                                                                   |                       |              |
|-----------------------|-------------------------------------------|-------------------------------|---------------------------------------------------------------------------------------------------------------------------------------------------------------------------------------------------------------------------------------------------------------------------------------------------------------------------------------------------|-----------------------|--------------|
|                       |                                           |                               | national insurance and superannuation contributions) and appropriate capital, administrative and managerial overheads.                                                                                                                                                                                                                            |                       |              |
| Gibbard et al<br>(40) | Parent based intervention (PBI)           | Societal and provider         | <ul style="list-style-type: none"> <li>• Costs included labour, administration, and overheads.</li> <li>• Health personnel costs, hospital visit costs, capital and overheads, direct treatment costs.</li> <li>• Out-of-pocket expenses borne by patients and their families (travel costs, clinic cost) and productivity loss costs.</li> </ul> | Sterling Pounds, 1999 | Not reported |
| Royston et al<br>(46) | Stepping Stones Triple P (SSTP) programme | NHS, personal social services | <ul style="list-style-type: none"> <li>• Set up costs: Trainee and trainer time (and preparation time), travel costs,</li> </ul>                                                                                                                                                                                                                  | Sterling pounds 2018  | None         |

|                    |                                                          |                                   |                                                                                                                                                                                                                                                                                                                     |            |      |
|--------------------|----------------------------------------------------------|-----------------------------------|---------------------------------------------------------------------------------------------------------------------------------------------------------------------------------------------------------------------------------------------------------------------------------------------------------------------|------------|------|
|                    |                                                          | (PSS) and parents'/caregivers'    | <p>attendance incentives and course materials</p> <ul style="list-style-type: none"> <li>• Delivery costs: therapist time spent; any materials provided to parents</li> <li>• Health and social care utilisation costs</li> <li>• Expenditure on private use of treatments and therapies (out-of-pocket)</li> </ul> |            |      |
| Tinelli et al (48) | Preschool Autism Communication Trial (PACT) intervention | Service (public sector); societal | <ul style="list-style-type: none"> <li>• Service costs, (healthcare, education, social care)</li> <li>• Living costs, care and assistance, education, healthcare, travel, training/support, and autism assistance dog.</li> </ul>                                                                                   | Euros 2020 | 3.5% |



|                        |                                   |                       |                                                                                                                                                                                                                                                                                                                                                         |                   |      |
|------------------------|-----------------------------------|-----------------------|---------------------------------------------------------------------------------------------------------------------------------------------------------------------------------------------------------------------------------------------------------------------------------------------------------------------------------------------------------|-------------------|------|
|                        |                                   |                       | <ul style="list-style-type: none"> <li>• Societal costs: schooling and childcare costs, productivity losses (due to parents taking time off work to care for an autistic child), and informal (unpaid) care.</li> </ul>                                                                                                                                 |                   |      |
| Shimabukuro et al (47) | Well Parent Japan (WPJ) programme | Societal and personal | <ul style="list-style-type: none"> <li>• Staff time (programme delivery and preparation), consumables and therapist supervision. Therapist travel costs were not included as it was expected that once implemented the intervention would be delivered within their regular place of work.</li> <li>• Personal health care utilisation costs</li> </ul> | Japanese Yen 2021 | None |

<sup>a</sup>NHS: National Health Service

<sup>b</sup>GP: General Practitioner

<sup>c</sup>CIC: Caring in Chaos

<sup>d</sup>ABA: Applied Behaviour Analysis

<sup>e</sup>IY: Incredible Years

<sup>f</sup>PMT: Parent Management Training

## Sensitivity analysis

At least one form of sensitivity analysis was carried out in 14 of the eligible studies as shown in Table 4. Scenario analysis was carried out in two studies (38, 39), univariate sensitivity analysis was carried out in eight studies (30, 31, 33, 34, 40-42, 46), two studies (37, 41) carried out a multivariate sensitivity analysis, one study carried out a deterministic sensitivity analysis (48) and probabilistic sensitivity analysis was carried out in five studies (30, 33, 35, 36, 39). Six studies did not conduct sensitivity analysis to explore uncertainties around their results (28, 29, 32, 43, 44, 47).



Table 4: Clinical and economic outcomes of the economic evaluation studies included in this review.

| Study                              | Intervention(s)                                        | Comparator             | Clinical outcome                                                                                                                                                                                     | Economic outcome                                                  | Sensitivity analysis                           |
|------------------------------------|--------------------------------------------------------|------------------------|------------------------------------------------------------------------------------------------------------------------------------------------------------------------------------------------------|-------------------------------------------------------------------|------------------------------------------------|
| <b>Cost-effectiveness analysis</b> |                                                        |                        |                                                                                                                                                                                                      |                                                                   |                                                |
| Scavenius et al (28)               | CiC <sup>a</sup> is a manual-based program             | Waitlist control group | <ul style="list-style-type: none"> <li>Parenting competence measure by Parenting Sense Competence Scale (PSOC)</li> <li>Child functioning measured by Home Situations Questionnaire (HSQ)</li> </ul> | per Cohen's d effect sizes (ES) improvement (in the PSOC and HSQ) | Not reported                                   |
| Segal et al (30)                   | iBASIS–Video Interaction to Promote Positive Parenting | Treatment as usual     | Incidence of ASD diagnosis                                                                                                                                                                           | per lower incident case of diagnosed ASD                          | Univariate analyses and probabilistic analyses |

|                          |                                                                                            |                                 |                                                                                                        |                                           |                                                                |
|--------------------------|--------------------------------------------------------------------------------------------|---------------------------------|--------------------------------------------------------------------------------------------------------|-------------------------------------------|----------------------------------------------------------------|
|                          | (iBASIS-VIPP)<br>intervention                                                              |                                 |                                                                                                        |                                           |                                                                |
| Byford et al<br>(32)     | Pre-school Autism<br>Communication therapy                                                 | Treatment as usual              | (ADOS-G) Autism<br>Diagnostic Observation<br>Schedule-Generic score                                    | per ADOS-G score<br>improvement           | Not reported                                                   |
| Kuklinski et al<br>(35)  | First Step Next (FSN)<br>intervention                                                      | Home based<br>intervention (hB) | Clinical outcomes (ADHD <sup>b</sup><br>vs CD <sup>d</sup> vs ADHD <sup>b</sup> plus CD <sup>d</sup> ) | Per case reduction                        | Probabilistic sensitivity<br>analysis                          |
| Tran et al (41)          | Child Life and Attention<br>Skills (CLAS) program<br>and parent-focused<br>treatment (PFT) | Treatment as usual              | Not reported                                                                                           | Per resolved ADHD <sup>b</sup> -I<br>case | One way and multiway<br>sensitivity analysis                   |
| O'Farrelly et<br>al (39) | Video-feedback<br>Intervention to promote<br>Positive Parenting and                        | Treatment as usual              | Preschool Parental Account<br>of Children's Symptoms<br>(PPACS) score                                  | Per point improvement<br>in PPACS score   | Probabilistic sensitivity<br>analysis and scenario<br>analysis |

|                              |                                                 |                    |                                                                                                                                       |                                                             |                                    |
|------------------------------|-------------------------------------------------|--------------------|---------------------------------------------------------------------------------------------------------------------------------------|-------------------------------------------------------------|------------------------------------|
|                              | Sensitive Discipline<br>(VIPP-SD)               |                    |                                                                                                                                       | Quality adjusted life<br>years (QALYs) (not<br>reported)    |                                    |
| Gibbard et al<br>(40)        | Parent based<br>intervention (PBI)              | Treatment as usual | Six measures on the child's<br>linguistic complexity from a<br>single word level to that of<br>using three-to-four-word<br>utterances | Per change in measure<br>score                              | Univariate sensitivity<br>analysis |
| Royston et al<br>(46)        | Stepping Stones<br>Triple P (SSTP)<br>programme | Treatment as usual | Child Behaviour Check List<br>(CBCL) score                                                                                            | per CBCL score<br>improvement                               | Univariate sensitivity<br>analysis |
| Shimabukuro<br>et al (47)    | Well Parent Japan (WPJ)<br>programme            | Treatment as usual | Parent-domain parenting<br>stress score                                                                                               | per reduction in<br>parent-domain<br>parenting stress score | Not reported                       |
| <b>Cost utility analysis</b> |                                                 |                    |                                                                                                                                       |                                                             |                                    |

|                       |                                                                          |                               |                                                                                                                                                                                                                 |                                            |                           |
|-----------------------|--------------------------------------------------------------------------|-------------------------------|-----------------------------------------------------------------------------------------------------------------------------------------------------------------------------------------------------------------|--------------------------------------------|---------------------------|
| Sayal et al<br>(29)   | Parent only intervention<br><br>Combined parent-<br>teacher intervention | Waitlist control<br><br>group | <ul style="list-style-type: none"> <li>• Parent- rated ADHD index</li> <li>• Scores on the other parent-rated sub-scales and all the teacher-rated sub-scales of the Conners' Rating Scale – Revised</li> </ul> | Quality adjusted life<br><br>years (QALYs) | Not reported              |
| Charman et al<br>(31) | Predictive Parenting<br><br>intervention                                 | Psychoeducation               | <ul style="list-style-type: none"> <li>• Behaviours That Challenge (BTC) per minute</li> <li>• Autism Parenting Stress Index, Parent Efficacy scale</li> </ul>                                                  | Quality adjusted life<br><br>years (QALYs) | Univariate analysis       |
| Nystrand et al        | COPE Connect                                                             | Waitlist control              | Swanson, Nolan and                                                                                                                                                                                              | Disability adjusted life                   | Probabilistic sensitivity |



|                            |                                                                                          |                                                                                                   |                                                                                                 |                                            |                                                     |
|----------------------------|------------------------------------------------------------------------------------------|---------------------------------------------------------------------------------------------------|-------------------------------------------------------------------------------------------------|--------------------------------------------|-----------------------------------------------------|
| (33)                       | intervention.<br><br>Comet intervention<br><br>Incredible Years (IY)<br><br>intervention | group                                                                                             | Pelham Scale (SNAP-IV)<br><br>score<br><br>Eyberg Child Behaviour<br><br>Inventory (ECBI) score | years (DALYs)                              | analysis and univariate<br><br>sensitivity analyses |
| Penner et al<br><br>(37)   | Parent delivered Early<br><br>Start Denver Model<br><br>(ESDM)                           | Status Quo                                                                                        | Intelligence Quotient (IQ)                                                                      | Dependency-free life<br><br>years (DFLYs)  | Multiple one-way<br><br>sensitivity analysis        |
| Nystrand et al<br><br>(38) | Parent management<br><br>Training (PMT)<br><br>programme                                 | Coping Power<br><br>Programme and<br><br>parent management<br><br>Training (PMT)<br><br>programme | Parent-rated Disruptive<br><br>Behaviour Disorder rating<br><br>scale (DBD-ODD)                 | Quality adjusted life<br><br>years (QALYs) | Scenario analysis                                   |
| Royston et al<br><br>(46)  | Stepping Stones<br><br>Triple P (SSTP)<br><br>programme                                  | Treatment as usual                                                                                | Child Behaviour Check List<br><br>(CBCL) score                                                  | Quality adjusted life<br><br>years (QALYs) | Univariate analysis                                 |

| <b>Cost benefit analysis</b>      |                                                                     |                                  |                                                                                    |                   |                                    |
|-----------------------------------|---------------------------------------------------------------------|----------------------------------|------------------------------------------------------------------------------------|-------------------|------------------------------------|
| Nystrand et al<br>(36)            | Parent training programmes (COPE, Comet, Incredible Years, Connect) | Waitlist control group           | Swanson, Nolan and Pelham scale (SNAP-IV) scores                                   | Net present value | Probabilistic sensitivity analysis |
| <b>Other economic evaluations</b> |                                                                     |                                  |                                                                                    |                   |                                    |
| Sonuga-Barke et al (44)           | New Forst Parenting Programme (NFPP)                                | Incredible Years (IY)            | Parent ratings of child's ADHD symptoms<br>Reduction of parent-rated ADHD symptoms | N/A               | Not reported                       |
| Tsiplova et al<br>(34)            | Parenting coaching intervention                                     | Enhanced community treatment     | Not reported                                                                       | N/A               | Univariate analysis                |
| Page et al (42)                   | Group behavioral parent training                                    | Medication for ADHD <sup>b</sup> | Not reported                                                                       | N/A               | Univariate analyses                |

|                        |                                                                |                                |                                                                      |     |                                       |
|------------------------|----------------------------------------------------------------|--------------------------------|----------------------------------------------------------------------|-----|---------------------------------------|
| Ferguson et al<br>(43) | ABA <sup>c</sup> - based parent<br>training                    | Face to face model<br>training | Child affect measure                                                 | N/A | Not reported                          |
| Tinelli et al<br>(48)  | Preschool Autism<br>Communication Trial<br>(PACT) intervention | Treatment as usual             | Autism Diagnostic<br>Observation Schedule-<br>Generic (ADOS-G) score | N/A | Deterministic<br>sensitivity analyses |

<sup>a</sup>CIC: Caring in Chaos

<sup>b</sup>ADHD: Attentive Deficit Hyperactivity Disorder

<sup>c</sup>ABA:Applied Behaviour Analysis

<sup>d</sup>CD; Conduct disorder

<sup>e</sup>PMT: Parent Management Training

## 302 Statistical analysis

303 Of the trial based economic evaluations, twelve of these studies further applied statistical  
304 analysis. Nine studies (28, 29, 31, 32, 34, 38, 40, 46, 47) applied regression models and  
305 bootstrapping methods to analyse the differences in costs and outcomes, whilst two studies  
306 (32, 46) adjusted for missing data. With trials being designed to assess the effectiveness of  
307 a new intervention for a specific population and CEAs/CUAs designed to account for  
308 benefits for even those not receiving a new health intervention, statistical analyses should  
309 be applied to address methodological challenges that may arise with the joint analysis.

## 310 Economic evaluation findings and policy suggestions

311 Evidence of the findings of the economic evaluations of the caregiver interventions are  
312 summarised in Table 5. Of the 9 CEA studies and 5 CUA studies, four studies (31, 32, 38,  
313 39) did not report outcomes using incremental cost effectiveness ratios (ICERs) due to small  
314 to no differences in the outcomes. Several of the studies reported the intervention as cost-  
315 effective (n=9) and cost-saving (n=5) especially when considering the long-term effects. A  
316 few of the studies found the intervention less likely to be cost effective. Charman et al  
317 (2021) found the predictive parenting intervention more costly and less cost-effective than  
318 its comparator (31). Similarly, Byford et al (2015) found the combination of pre-school  
319 autism communication therapy (PACT) and usual treatment to have higher costs and no  
320 significant difference in outcomes (32). Page et al (2016) found medication to be  
321 recommended for treatment of ADHD as it maximizes the societal cost compared to group  
322 behavioural therapy (42). With the willingness to pay threshold being arbitrary, most of  
323 the studies used varied thresholds to determine cost-effectiveness of the interventions.

Table 5: Summary of findings and policy implications

| Study                | Intervention(s)                                                  | Type of economic evaluation | Costs                                                                                                                                                             | Incremental cost effectiveness ratio (ICER)                                                 | Willingness-to-pay (WTP) threshold                   | Policy implications                                                                                        |
|----------------------|------------------------------------------------------------------|-----------------------------|-------------------------------------------------------------------------------------------------------------------------------------------------------------------|---------------------------------------------------------------------------------------------|------------------------------------------------------|------------------------------------------------------------------------------------------------------------|
| Scavenius et al (28) | CiC <sup>c</sup> is a manual-based program                       | Cost effectiveness analysis | Initial development costs \$91,916 (671,265 DKK)<br>Setup cost of training and running costs \$67,648 (494,034 DKK)<br>Cost per treated child \$1,178 (8,601 DKK) | \$1,707 (12,465 DKK) per effect size in PSOC<br>\$3,272 (23,892 DKK) per effect size in HSQ | \$4,117 per family for one effect size in PSOC score | CiC may be a cost-effective alternative for improving parental competence, compared to other BPT programs. |
| Sayal et al (29)     | Parent only intervention<br>Combined parent-teacher intervention | Cost effectiveness analysis | Parent-only intervention £90<br>Combined interventions £107                                                                                                       | Parent-only intervention: £29 per one point                                                 | £31 per one-point improvement in the ADHD index      | For children at risk of ADHD, an intervention programme for parents and teachers was                       |

| Study            | Intervention(s)                                                                   | Type of economic evaluation                   | Costs                                                                                                      | Incremental cost effectiveness ratio (ICER)                                                                         | Willingness-to-pay (WTP) threshold | Policy implications                                                                                                                                         |
|------------------|-----------------------------------------------------------------------------------|-----------------------------------------------|------------------------------------------------------------------------------------------------------------|---------------------------------------------------------------------------------------------------------------------|------------------------------------|-------------------------------------------------------------------------------------------------------------------------------------------------------------|
|                  |                                                                                   |                                               | <p>Incremental cost parent-only programme: £73</p> <p>Incremental cost of the combined programme: £123</p> | <p>improvement in the ADHD index</p> <p>Combined intervention: £134 per one point improvement in the ADHD index</p> |                                    | <p>not associated with improvement in core ADHD symptoms.</p> <p>The parent-only intervention programme suggested some potential for cost-effectiveness</p> |
| Segal et al (30) | iBASIS–Video Interaction to Promote Positive Parenting (iBASIS-VIPP) intervention | Cost analysis and Cost-effectiveness analysis | Total cost of iBASIS-VIPP delivery (including TAU services): A \$5477 (US \$3850) per child                | Cost per reduction in an ASD diagnosis at age 3 years: A \$37 181 (US \$26 138)                                     | Not stated                         | <p>iBASIS-VIPP is likely highly cost-effective.</p> <p>iBASIS-VIPP likely represents a good-value societal investment.</p>                                  |

| Study | Intervention(s) | Type of economic evaluation | Costs                                                                                                               | Incremental cost effectiveness ratio (ICER)                                                                                                                                                        | Willingness-to-pay (WTP) threshold | Policy implications                                                                                                                                |
|-------|-----------------|-----------------------------|---------------------------------------------------------------------------------------------------------------------|----------------------------------------------------------------------------------------------------------------------------------------------------------------------------------------------------|------------------------------------|----------------------------------------------------------------------------------------------------------------------------------------------------|
|       |                 |                             | <p>Total cost of TAU group: A \$346 (US \$243) per child</p> <p>Cost difference: A \$5131 (US \$3607) per child</p> | <p>NPV cost savings: A \$10 695 (US \$7519) per child enrolled in iBASIS-VIPP (at 12 years age)</p> <p>Return of investment: A \$3.08 (and US \$3.08) for each dollar invested in iBASIS-VIPP.</p> |                                    | <p>Identifying pre-emptive interventions that are efficacious and represent good value is an important input to resource allocation decisions.</p> |

| Study                   | Intervention(s)                      | Type of economic evaluation                                     | Costs                                                                                                                                                                           | Incremental cost effectiveness ratio (ICER) | Willingness-to-pay (WTP) threshold | Policy implications                                                                                                                                                                                                                                                     |
|-------------------------|--------------------------------------|-----------------------------------------------------------------|---------------------------------------------------------------------------------------------------------------------------------------------------------------------------------|---------------------------------------------|------------------------------------|-------------------------------------------------------------------------------------------------------------------------------------------------------------------------------------------------------------------------------------------------------------------------|
|                         |                                      |                                                                 |                                                                                                                                                                                 |                                             |                                    |                                                                                                                                                                                                                                                                         |
| Sonuga-Barke et al (44) | New Forst Parenting Programme (NFPP) | Cost analysis (initially planned to do a cost utility analysis) | Total NFPP cost per family: £1591<br><br>Total IY cost per family: £2103<br><br>Cost difference: £512<br><br>NFPP intervention costs: £1081<br><br>IY intervention costs: £1569 | N/A                                         | N/A                                | The finding that NFPP may be less costly than IY supports a revision of NICE's recommendations in favour of group rather than individual services. Both individually delivered and group-based PT should be made available to families of children with preschool ADHD. |



| Study              | Intervention(s)                   | Type of economic evaluation | Costs                                                                                                                                                                                                      | Incremental cost effectiveness ratio (ICER) | Willingness-to-pay (WTP) threshold | Policy implications                                                                                                |
|--------------------|-----------------------------------|-----------------------------|------------------------------------------------------------------------------------------------------------------------------------------------------------------------------------------------------------|---------------------------------------------|------------------------------------|--------------------------------------------------------------------------------------------------------------------|
| Charman et al (31) | Predictive Parenting intervention | Cost effectiveness analysis | Predictive Parenting<br>Total NHS/PSS costs:<br>£789.77<br><br>Total public sector costs:<br>£1,393.42<br><br>Total societal costs:<br>£3,092.87<br><br>Psychoeducation<br>Total NHS/PSS costs:<br>£434.48 | No difference in QALYs                      | £30,000 per QALY gain              | Predictive Parenting was more expensive than Psychoeducation, with a low probability of being more cost-effective. |

| Study             | Intervention(s)                         | Type of economic evaluation | Costs                                                                                                                                      | Incremental cost effectiveness ratio (ICER) | Willingness-to-pay (WTP) threshold | Policy implications                                                                                                                                                                                                            |
|-------------------|-----------------------------------------|-----------------------------|--------------------------------------------------------------------------------------------------------------------------------------------|---------------------------------------------|------------------------------------|--------------------------------------------------------------------------------------------------------------------------------------------------------------------------------------------------------------------------------|
|                   |                                         |                             | Total public sector costs:<br>£700.19<br><br>Total societal costs:<br>£2,181.74                                                            |                                             |                                    |                                                                                                                                                                                                                                |
| Byford et al (32) | Pre-school Autism Communication therapy | Cost effectiveness analysis | Total cost PACT intervention: £4,105 per child<br><br>PACT + TAU<br><br>Total health, education and social service costs: £6,539 per child | Not explicitly stated                       | Varied                             | PACT is associated with significantly greater costs and no significant difference in outcome, and thus should not be recommended as a cost-effective in addition to TAU. PACT plus TAU would only have a higher probability of |

| Study               | Intervention(s)                                                                                | Type of economic evaluation | Costs                                                                                                                                              | Incremental cost effectiveness ratio (ICER)            | Willingness-to-pay (WTP) threshold | Policy implications                                                                                        |
|---------------------|------------------------------------------------------------------------------------------------|-----------------------------|----------------------------------------------------------------------------------------------------------------------------------------------------|--------------------------------------------------------|------------------------------------|------------------------------------------------------------------------------------------------------------|
|                     |                                                                                                |                             | Total societal cost: £57919<br><br>TAU<br><br>Total health, education and social service costs: £2050 per child<br><br>Total societal cost: £56534 |                                                        |                                    | being cost-effective compared to TAU alone if society is willing to pay extra for improvements in outcome. |
| Nystrand et al (33) | COPE Connect intervention.<br><br>Comet intervention<br><br>Incredible Years (IY) intervention | Cost utility analysis       | Total cost per child<br><br>Comet: \$931<br><br>Connect: \$334<br><br>Incredible Years: \$1302<br><br>COPE: \$478                                  | Comet: \$972 per DALY averted<br><br>Connect: dominant | US\$ 15,000 per DALY               | Parenting interventions are cost-effective in the longer run in comparison to a waitlist control.          |

| Study               | Intervention(s)                 | Type of economic evaluation | Costs                                            | Incremental cost effectiveness ratio (ICER)                                            | Willingness-to-pay (WTP) threshold | Policy implications                                                                                                                                                                               |
|---------------------|---------------------------------|-----------------------------|--------------------------------------------------|----------------------------------------------------------------------------------------|------------------------------------|---------------------------------------------------------------------------------------------------------------------------------------------------------------------------------------------------|
|                     |                                 |                             | Bibliotherapy: \$14                              | Incredible Years: \$1224 per DALY averted<br>COPE: dominant<br>Bibliotherapy: dominant |                                    | Bibliotherapy or COPE are the most efficient options when comparing interventions to one another. Optimal decision for investment should be based on budget considerations and priority settings. |
| Tsiplova et al (34) | Parenting coaching intervention | Cost analysis               | Public payer<br>PC group cost: \$6594 per family | N/A                                                                                    | N/A                                | The PACE Coaching project demonstrated that a parent coaching intervention can be                                                                                                                 |

| Study | Intervention(s) | Type of economic evaluation | Costs                                                                                                                                                                                                  | Incremental cost effectiveness ratio (ICER) | Willingness-to-pay (WTP) threshold | Policy implications                                                                                                                                                                                                                                     |
|-------|-----------------|-----------------------------|--------------------------------------------------------------------------------------------------------------------------------------------------------------------------------------------------------|---------------------------------------------|------------------------------------|---------------------------------------------------------------------------------------------------------------------------------------------------------------------------------------------------------------------------------------------------------|
|       |                 |                             | ECT group cost: \$4079 per family<br><br>Mean incremental difference: \$2515<br><br>Societal<br><br>PC group cost: \$23,925<br><br>ECT group cost: \$16,931<br><br>Mean incremental difference: \$6994 |                                             |                                    | successfully implemented in a community setting.<br><br>The present cost analysis identified and measured major cost components of the coaching intervention which could be valuable for public funding and planning decisions to serve this population |

| Study                | Intervention(s)                    | Type of economic evaluation | Costs                                                                                                                                   | Incremental cost effectiveness ratio (ICER)                                                                                                      | Willingness-to-pay (WTP) threshold | Policy implications                                                                                                                                               |
|----------------------|------------------------------------|-----------------------------|-----------------------------------------------------------------------------------------------------------------------------------------|--------------------------------------------------------------------------------------------------------------------------------------------------|------------------------------------|-------------------------------------------------------------------------------------------------------------------------------------------------------------------|
| Kuklinski et al (35) | First Step Next (FSN) intervention | Cost effectiveness analysis | <p>Total cost of delivering FSN: US\$3,226 per student</p> <p>Total cost of delivering combined intervention: US\$3,801 per student</p> | <p>ADHD FSN: \$12,433 per case reduction</p> <p>Combined intervention: \$8,503 per case reduction</p> <p>CD FSN: \$14,661 per case reduction</p> | Varied                             | <p>The combined intervention was more cost effective.</p> <p>Improvement in comorbid ADHD and CD was the costliest to achieve, followed by CD, and then ADHD.</p> |

| Study | Intervention(s) | Type of economic evaluation | Costs | Incremental cost effectiveness ratio (ICER)                                                                                                                                | Willingness-to-pay (WTP) threshold | Policy implications |
|-------|-----------------|-----------------------------|-------|----------------------------------------------------------------------------------------------------------------------------------------------------------------------------|------------------------------------|---------------------|
|       |                 |                             |       | Combined intervention:<br>\$11,051 per case reduction<br><br>ADHD plus CD<br>FSN: \$16,909 per case reduction<br><br>Combined intervention:<br>\$12,131 per case reduction |                                    |                     |

| Study                  | Intervention(s)                                                     | Type of economic evaluation | Costs                                                                                                                                                 | Incremental cost effectiveness ratio (ICER)                                                                                                       | Willingness-to-pay (WTP) threshold | Policy implications                                                                                                                                                                                                               |
|------------------------|---------------------------------------------------------------------|-----------------------------|-------------------------------------------------------------------------------------------------------------------------------------------------------|---------------------------------------------------------------------------------------------------------------------------------------------------|------------------------------------|-----------------------------------------------------------------------------------------------------------------------------------------------------------------------------------------------------------------------------------|
|                        |                                                                     |                             |                                                                                                                                                       |                                                                                                                                                   |                                    |                                                                                                                                                                                                                                   |
| Nystrand et al<br>(36) | Parent training programmes (COPE, Comet, Incredible Years, Connect) | Cost benefit analysis       | Intervention costs per child<br><br>Comet: € 817<br><br>Connect: € 295<br><br>Incredible Years: € 1142<br><br>COPE: € 417<br><br>Self-help book: € 13 | Benefit cost ratio<br><br>Comet: € 7<br><br>Connect: € 10.61<br><br>Incredible Years: € 5.96<br><br>COPE: € 15.80<br><br>Self-help book: € 328.04 | Not stated                         | All the evaluated interventions within this study appear to be of good value-for money and yield substantial societal returns when adapted to various community populations, evidence that is relevant for local decision-making. |



| Study           | Intervention(s)                                                                   | Type of economic evaluation | Costs                                                                                                                                                                                  | Incremental cost effectiveness ratio (ICER)                                                                                                                               | Willingness-to-pay (WTP) threshold | Policy implications                                                                                                                                                                                                                                                          |
|-----------------|-----------------------------------------------------------------------------------|-----------------------------|----------------------------------------------------------------------------------------------------------------------------------------------------------------------------------------|---------------------------------------------------------------------------------------------------------------------------------------------------------------------------|------------------------------------|------------------------------------------------------------------------------------------------------------------------------------------------------------------------------------------------------------------------------------------------------------------------------|
| Tran et al (41) | Child Life and Attention Skills (CLAS) program and parent-focused treatment (PFT) | Cost effectiveness analysis | <p>Total cost per patient</p> <p>CLAS: \$1559</p> <p>PFT: \$710</p> <p>TAU: \$0</p> <p>Incremental cost per patient</p> <p>PFT: \$710</p> <p>CLAS: \$1559</p> <p>(compared to TAU)</p> | <p>CLAS versus TAU</p> <p>\$3997 per disordered case</p> <p>PFT versus TAU</p> <p>\$3227 per disordered case</p> <p>CLAS versus PFT</p> <p>\$4994 per disordered case</p> | Not stated                         | <p>Nonpharmacological behavioural interventions can be viable, cost-effective treatment options for children with ADHD-I.</p> <p>Future investigations are needed to evaluate cost-effectiveness of treatment for improving specific impairments associated with ADHD-I.</p> |

| Study             | Intervention(s)                                  | Type of economic evaluation | Costs                                                                                                             | Incremental cost effectiveness ratio (ICER) | Willingness-to-pay (WTP) threshold | Policy implications                                                                                                                                                                                          |
|-------------------|--------------------------------------------------|-----------------------------|-------------------------------------------------------------------------------------------------------------------|---------------------------------------------|------------------------------------|--------------------------------------------------------------------------------------------------------------------------------------------------------------------------------------------------------------|
| Page et al (42)   | Group behavioral parent training                 | Cost analysis               | Behavior modification (group parent training)<br>cost: \$961<br><br>Low dose of stimulant medication cost: \$1689 | N/A                                         | N/A                                | Medication is more likely be recommended than behavioural treatment and used as a first line treatment for ADHD, despite its greater cost, and this approach maximizes the societal cost of ADHD treatments. |
| Penner et al (37) | Parent delivered Early Start Denver Model (ESDM) | Cost effectiveness analysis | Provincial perspective costs<br><br>Status Quo (SQ): \$186,000 per person                                         | ESDM-I vs SQ: \$23,000/DFLY                 | Varied                             | Caregiver costs were a significant driver in cost-effectiveness estimates; consequently, from a societal                                                                                                     |

| Study               | Intervention(s)                            | Type of economic evaluation | Costs                                                                                                                         | Incremental cost effectiveness ratio (ICER) | Willingness-to-pay (WTP) threshold | Policy implications                                                                                                                                                            |
|---------------------|--------------------------------------------|-----------------------------|-------------------------------------------------------------------------------------------------------------------------------|---------------------------------------------|------------------------------------|--------------------------------------------------------------------------------------------------------------------------------------------------------------------------------|
|                     |                                            |                             | <p>ESDM-Parent Delivered model (ESDM-PD): \$178,000 per person</p> <p>ESDM Intensive model (ESDM-I): \$199,000 per person</p> | ESDM-I vs ESDM-PD: \$58,000/DFLY            |                                    | <p>perspective the pre-diagnosis intensive ESDM generated both cost-savings and enhanced outcomes relative to both the status quo and pre-diagnosis parent-delivered ESDM.</p> |
| Nystrand et al (38) | Parent management Training (PMT) programme | Cost effectiveness analysis | CPP intervention total cost per child: \$584                                                                                  | Small difference in QALY gains              | Varied                             | The results show that stacking treatments such as child-CBT and PMT may be money well spent compared                                                                           |

| Study               | Intervention(s)            | Type of economic evaluation | Costs                                   | Incremental cost effectiveness ratio (ICER) | Willingness-to-pay (WTP) threshold | Policy implications                                                                                                                                                                            |
|---------------------|----------------------------|-----------------------------|-----------------------------------------|---------------------------------------------|------------------------------------|------------------------------------------------------------------------------------------------------------------------------------------------------------------------------------------------|
|                     |                            |                             |                                         |                                             |                                    | <p>to PMT only.</p> <p>Although costs are relatively small for the child component, investment in delivering both PMT and CPP depends on the willingness-to-pay for such a prioritisation.</p> |
| Ferguson et al (43) | ABA- based parent training | Cost analysis               | Total project cost: £1,509.3 per parent | N/A                                         | N/A                                | A telehealth training platform should be considered by behaviour                                                                                                                               |

| Study | Intervention(s) | Type of economic evaluation | Costs | Incremental cost effectiveness ratio (ICER) | Willingness-to-pay (WTP) threshold | Policy implications                                                                                                                                                                                                                                                                        |
|-------|-----------------|-----------------------------|-------|---------------------------------------------|------------------------------------|--------------------------------------------------------------------------------------------------------------------------------------------------------------------------------------------------------------------------------------------------------------------------------------------|
|       |                 |                             |       |                                             |                                    | <p>analysts to expand their knowledge and increase the reach of their services, which could have benefits for parents who are not able to avail of training locally.</p> <p>Additional cost savings identified highlight the potential of a telehealth platform for service provision.</p> |

| Study                 | Intervention(s)                                                                              | Type of economic evaluation                            | Costs                                                                                                                                                                                                                                   | Incremental cost effectiveness ratio (ICER) | Willingness-to-pay (WTP) threshold | Policy implications                                                                                                                                                                                                                                                                               |
|-----------------------|----------------------------------------------------------------------------------------------|--------------------------------------------------------|-----------------------------------------------------------------------------------------------------------------------------------------------------------------------------------------------------------------------------------------|---------------------------------------------|------------------------------------|---------------------------------------------------------------------------------------------------------------------------------------------------------------------------------------------------------------------------------------------------------------------------------------------------|
| O'Farrelly et al (39) | Video-feedback Intervention to promote Positive Parenting and Sensitive Discipline (VIPP-SD) | Cost effectiveness analysis; cost consequence analysis | <p>5 month follow up</p> <p>VIPP-SD intervention total costs: £1827.55</p> <p>Usual care total costs: £510.18</p> <p>24 month follow up</p> <p>VIPP-SD intervention total costs: £ 3131.93</p> <p>Usual care total costs: £ 1525.38</p> | Very small differences in QALYs             | > £800 for a 1-point improvement   | <p>VIPP-SD is more costly and more effective than usual care.</p> <p>PPACS is not associated with a WTP threshold to support decision-making (compared with QALYs with a NICE WTP threshold of £20,000–30,000 per QALY), it is not possible to come to any firm conclusion about the relative</p> |

| Study              | Intervention(s)                 | Type of economic evaluation | Costs                                                                                                           | Incremental cost effectiveness ratio (ICER) | Willingness-to-pay (WTP) threshold | Policy implications                                                                                                                                                                                                                                                          |
|--------------------|---------------------------------|-----------------------------|-----------------------------------------------------------------------------------------------------------------|---------------------------------------------|------------------------------------|------------------------------------------------------------------------------------------------------------------------------------------------------------------------------------------------------------------------------------------------------------------------------|
|                    |                                 |                             |                                                                                                                 |                                             |                                    | cost-effectiveness of VIPP-SD in the short term.                                                                                                                                                                                                                             |
| Gibbard et al (40) | Parent based intervention (PBI) | Cost effectiveness analysis | Cost per child<br>PBI: £96<br>General care: £80.83<br><br>Cost per parent<br>PBI: £31.80<br>General care: £5.78 | £10.97 per score gained                     | Not explicitly stated              | The results of this study are supportive of the effectiveness of this parent intervention programme, employing the setting of specific linguistic targets within the child's naturalistic setting. This method of intervention also would not incur significant increases in |

| Study              | Intervention(s)                           | Type of economic evaluation                             | Costs                                                                                    | Incremental cost effectiveness ratio (ICER)                                     | Willingness-to-pay (WTP) threshold           | Policy implications                                                                                                                                                                                                        |
|--------------------|-------------------------------------------|---------------------------------------------------------|------------------------------------------------------------------------------------------|---------------------------------------------------------------------------------|----------------------------------------------|----------------------------------------------------------------------------------------------------------------------------------------------------------------------------------------------------------------------------|
|                    |                                           |                                                         |                                                                                          |                                                                                 |                                              | cost per outcome gained over current practice and may, with modifications, result in cost savings.                                                                                                                         |
| Royston et al (46) | Stepping Stones Triple P (SSTP) programme | Cost effectiveness analysis (and cost utility analysis) | Cost per participant:<br>Intervention delivery £270<br>Training cost per participant £26 | Cost saving of –£1057.88 per participant<br><br>Very small differences in QALYs | £13,000, £20,000 and £30,000 per QALY gained | Stepping Stones Triple P is probably value for money to deliver, but decisions to roll this out as an alternative to existing parenting interventions or treatment as usual may be dependent on policymaker willingness to |



| Study              | Intervention(s)                                          | Type of economic evaluation | Costs                                                                                                                                                                                                                 | Incremental cost effectiveness ratio (ICER) | Willingness-to-pay (WTP) threshold | Policy implications                                                                                                                                                                                                                 |
|--------------------|----------------------------------------------------------|-----------------------------|-----------------------------------------------------------------------------------------------------------------------------------------------------------------------------------------------------------------------|---------------------------------------------|------------------------------------|-------------------------------------------------------------------------------------------------------------------------------------------------------------------------------------------------------------------------------------|
|                    |                                                          |                             |                                                                                                                                                                                                                       |                                             |                                    | invest in early interventions to reduce behaviours that challenge.                                                                                                                                                                  |
| Tinelli et al (48) | Preschool Autism Communication Trial (PACT) intervention | Cost consequence analysis   | Total service perspective (health, education, and social services): England € 61,104; Ireland € 80,838; Italy € 31,204; Spain € 129,339<br><br>Total societal perspective (including parental productivity losses and | N/A                                         | N/A                                | PACT is cost-saving over time from a societal perspective, even though we confirmed that, at 13 months post-delivery, PACT is more expensive than usual treatment (across all countries) when given to preschool autistic children. |

| Study                  | Intervention(s)                   | Type of economic evaluation | Costs                                                                                   | Incremental cost effectiveness ratio (ICER) | Willingness-to-pay (WTP) threshold                | Policy implications                                                                                                                    |
|------------------------|-----------------------------------|-----------------------------|-----------------------------------------------------------------------------------------|---------------------------------------------|---------------------------------------------------|----------------------------------------------------------------------------------------------------------------------------------------|
|                        |                                   |                             | informal care): England € 465,567; Ireland € 490,634; Italy € 366,299; Spain € 368,496. |                                             |                                                   | After 6 years, we found that PACT has lower costs than usual treatment in terms of unpaid care provided by parents (in all countries). |
| Shimabukuro et al (47) | Well Parent Japan (WPJ) programme | Cost effectiveness analysis |                                                                                         | 6,707 (JPY) (\$ 61.93) per QALY gained      | 10,000 JPY (\$ 108.30) and 20,000 JPY (\$ 216.60) | The cost-effectiveness analyses showed intervention costs to be modest and the programme cost-effective.                               |

## 324 **Methodological issues of economic evaluations**

325 Although many of the included economic evaluations were rated average or good, many  
326 had methodological limitations, emphasising the challenges often faced in the conduct of  
327 economic evaluations of caregiver interventions for children with DDs. A few factors  
328 impact on the validity of conclusions drawn in economic evaluation such as accuracy of  
329 cost information, choice of discount rate, scope, modelling and time horizon and  
330 perspective. However, three main methodological challenges were identified from the  
331 literature as representative of the methodological issues more specific to conducting  
332 economic evaluations of caregiver interventions for young populations: 1) measuring and  
333 valuing cost, 2) measuring health outcomes and 3) time horizon analysis.

### 334 **Measuring and valuing costs**

335 A prominent challenge related to cost measurement and valuation was the cost categories  
336 included. The studies identified exclusion of important cost inputs that would over- or  
337 underestimate the cost-effectiveness outcome. For societal costs, Scavenius et al (2020) did  
338 not account for productivity loss costs (28), and Nystrand et al (2019) did not include  
339 caregiver health and well-being costs and the costs of behaviour problem consequences in  
340 adulthood which would be significant cost offsets in the long term (33). Regarding provider  
341 costs, Tsiplova et al (2022) excluded certain costs such as intervention development costs,  
342 and training costs (materials, coaches travel expenses, coach training) (34), and Nystrand et  
343 al (2020) included only medication costs in the healthcare resource use (36). The accuracy  
344 of resources measurement was potentially limited by self-reporting of resource use for  
345 instance informal care and parent time costs in two studies (32, 41). Another challenge

346 noted in two studies (35, 41) was the lack of data, which limited the costs included in the  
347 analysis. Further, the selected perspective of the analysis was considered narrow in one  
348 study (33), because mental health interventions may have a broader societal impact, and  
349 interact with other sectors such as education, social services, justice, and voluntary sectors.  
350 Notably, Penner et al (2015) found that caregiver costs were a significant cost driver in the  
351 cost-effectiveness estimates further highlighting the importance of accounting for all  
352 relevant costs (37).

### 353 **Measuring health outcomes**

354 Measuring health related quality of life in children remains contentious because of the  
355 descriptive system or valuation perspective. Sayal et al (2016) utilized two measures CHU  
356 9D and EQ5D-Y which showed slight variance in results likely from the differences in the  
357 valuation processes employed (29). One study (33) used parental proxy rather than self-  
358 reported outcomes, which may be associated with misreporting. Also, based on the other  
359 health outcome measures applied in two studies (32, 39) it was noted that QALYs measures  
360 have mostly been applied in adult populations and may not be representative of the  
361 younger populations. Further, utility values were not available for some countries (36), or  
362 were condition-specific for instance per case reduction (37, 41), which limits the use of  
363 QALYs as outcome measures. Regarding application of DALYs, Nystrand et al (2019) stated  
364 this health outcome was limited by availability of a single disease weight for conduct  
365 disorders making it difficult to model changes in disorder severity without significant  
366 assumptions about the distribution of disorder and disability weight by severity. Moreover,  
367 children with some levels of problems who would benefit from the intervention and the

368 benefits incurred by parents, siblings and teachers were excluded, which would  
369 underestimate the health gains attributable to the interventions (33) .

## 370 Time horizon

371 Caregiver interventions for developmental disorders may result in long-term benefits and  
372 the choice of time horizon analysis should aim to capture all meaningful costs and  
373 outcomes. One trial based economic evaluation studies (41), modelled shorter timeframes  
374 due to lack of published data. However, the intervention showed a sustained effect with  
375 indication of it being even more cost-effective in later years of life. Similarly, O'Farrelly et  
376 al (2021) found that the short time horizon was a limitation as the participants were less  
377 likely to incur costs for service use relating to behavioural problems during the preschool  
378 period but instead when the child is older (39). Two studies (37, 39) reported that the use  
379 of multiple data sources to extrapolate results over longer periods and to different  
380 population should be used with caution because this would require many assumptions and  
381 huge uncertainties which would likely produce poor estimates of the results.

## 382 Discussion

383 This review identified economic evaluations of caregiver interventions for children with  
384 DDs and synthesized evidence on the methods adopted and their associated challenges.  
385 Thirty studies were identified that carried out both partial and full economic evaluations.  
386 Most of the studies evaluated interventions delivered through group programmes (47%)  
387 compared to individual based platforms (41%). One striking feature of this review is the  
388 heterogeneity of the economic evaluation approaches presented. The majority of studies

389 (70%) were trial based economic evaluations, which are considered suitable for inferring  
390 cost-effectiveness for interventions with no prior evidence (49). Current trial based  
391 economic evaluations have limited time horizons, often less than one year. Extending the  
392 time horizon of economic evaluations may lead to more favourable estimates (50),  
393 especially for interventions with long-term effects, as in the case of caregiver interventions.  
394 In our review seven studies extrapolated data over a one-year time horizon. However,  
395 extrapolation of data for long term models should be applied cautiously to minimize errors  
396 from multiple sources of data and the related assumptions. The uncertainties of parameters  
397 contribute to the overall model uncertainties whose potential impact can be assessed  
398 through scenario and sensitivity analyses, which are important considerations for economic  
399 evaluations (19). Modelling studies may help address some of the issues of RCTs with longer  
400 period projections of the cost estimates and outcomes, and should use available evidence of  
401 real-world data and assumptions. Our review identified only four studies, which applied a  
402 decision analytical modelling approach such as decision trees or Markov models. Within  
403 any economic evaluation modelling, there is a balance between adequately simplifying  
404 complex health states and interventions to allow model parameterisation, while avoiding  
405 oversimplification to the extent that findings are not representative of the real-world  
406 context (19). Even with diverseness of the methods applied, more than half (64%) of the  
407 reviewed studies found that the caregiver interventions were cost saving or cost-effective,  
408 while improving quality of life for the children and parents.

409 The studies reported varied levels of details of cost components used in the economic  
410 evaluations, with most studies including the major components as start-up and

411 implementation costs. A few (18%) of the reviewed studies included costs from other  
412 sectors or cost offsets as important cross cutting and relevant costs which significantly  
413 contribute to wholistic care of children with DDs. Children with DDs require various  
414 services often extending beyond healthcare, for instance social services, education,  
415 rehabilitation, and criminal and justice systems. Suhrcke et al (2008) conducted a  
416 systematic review demonstrating that for child and adolescent mental illness, only 6% of  
417 costs accounted for healthcare, with majority of the costs in other sectors (i.e. social  
418 services, education, productivity) (51). Moreover, the service needs for children with DDs  
419 changes with the setting and age during their lifetime (21). Therefore, quantifying service  
420 utilization for an economic evaluation of caregiver interventions may be challenging. Some  
421 of the reviewed studies excluded certain costs due to lack of data. For instance, one study  
422 (41) was unable to assess all costs necessary for a full societal approach , another study (33)  
423 applied a narrow costing perspective, which likely missed different social impacts, one  
424 other studies (35) used a limited health system perspective and only cost offsets for one  
425 episode of care. While inclusion of such costs may increase the intervention cost, the  
426 incremental costs of the intervention may also reduce. Adopting a narrower costing  
427 perspective may fail to incorporate other relevant sectors, which may bias study findings  
428 when most service utilization is beyond the healthcare system (1). The economic benefits  
429 that accrued over time are realized not only by the participant and family involved, but  
430 also by other sectors and society in general (40). In addition, the impact on productivity for  
431 caregivers may be considered in terms of time spent at work, and more often primary  
432 caregivers of children with DDs reduce working hours, give up work or change jobs to

433 provide care (1). Two main challenges with quantifying and valuing productivity are  
434 differentiating hours of care provided related to the DD compared to usual care and  
435 measuring productivity for children for their future earnings (52). One of the reviewed  
436 studies (28) excluded productivity costs of parents and indicated possible underestimation,  
437 whereas two studies (33, 41) included parent time costs which added value to the findings.  
438 Further, Penner et al (2015) indicated caregiver costs as a significant cost driver for the  
439 intervention (37). Although including productivity costs requires careful consideration,  
440 failure to capture productivity costs may potentially underestimate the resources use and  
441 effectiveness of the intervention (1).

442 Most of the included studies used cost effectiveness methods. Although informative, CEAs  
443 measure condition specific outcomes that are not directly comparable to other  
444 interventions targeting the same related problems or those across different diagnostic areas.  
445 In addition, the use of clinical measures undermines the likelihood of finding  
446 improvements that may be relevant to general well-being and everyday life, for instance  
447 improvement in quality of life. This is a key aspect of caregiver interventions that may have  
448 an impact on different areas of the children's and parents' lives. Therefore, cost utility  
449 studies which measure health outcomes with a generic health status that considers both  
450 mortality and the quality of life with morbidity would be preferred. In this review, only  
451 eight studies conducted CUAs with QALYs, DALYs and DFLYs used as the outcome  
452 measures. Measuring effectiveness of DDs is challenging and involves assessment of  
453 physical, behavioural, psychological, cognitive and social domains (1). In this regard, our



454 review highlighted methodological challenges towards measuring QALYs and DALYs in  
455 mental health and for the younger population.

456 First, the use of DALYs as an outcome may be limited by data availability on disease weights  
457 for specific DDs and the severity levels. For instance, Sampaio et al (2015) noted that  
458 conduct disorder (CD) doesn't have differential severity weights, and significant  
459 assumptions on the disorder distribution and disability weights would be required to model  
460 changes in disorder severity (53). Consequently, children with some levels of CD who  
461 would benefit from the intervention were excluded from the analysis, which would likely  
462 underestimate the health gains attributed to the reduction in disorder severity (53). A  
463 better approach would specify weights based on disorder severity as a reflection of  
464 heterogeneity in health (54). Second, the use of QALYs and the maximization approach to  
465 resource allocation in relation to mental health remains a contentious and understudied  
466 area (55). Specifically, QALY measures may be "mis-valued", insensitive and not specific to  
467 all mental health issues. Nonetheless, in failing to use QALYs there is risk of  
468 marginalization of mental health interventions in priority setting and budgeting processes.

469 Third, there are challenges in methods of measuring and valuing health related quality of  
470 life in children, which have been studied to a limited extent than the adult population. In  
471 a recent review, some of the challenges highlighted included how to elicit informed  
472 preferences, the generation and use of combined adult and adolescent preferences and the  
473 appropriateness and acceptability of valuation tasks for children and adolescents (56).  
474 Comparably, one of the included studies (32) was limited to measures available for children  
475 seven years of age and above, which was not suitable to the study population of pre-school

476 children. Mihalopolous et al (2015) highlighted that the study was limited by the  
477 availability of adult population parameters which would not be representative of anxiety  
478 problems and the disease duration estimates in young children (57). Thus, the use of  
479 different health related quality of life measures may show slight differences in the results,  
480 like one of the included studies (29). Although the indirect approaches of utility  
481 measurement from multi-attribute utility instruments including EuroQol 5 dimensions  
482 (EQ-5D) and Health Utilities Index (HUI) are more appropriate to measure health status of  
483 children with DDs, deriving the parameter estimates can be challenging because of age-  
484 appropriateness, the domains, and methods to derive utilities (58). Despite the challenges,  
485 there remains extensive opportunity for improvement of these estimates. Fourth, the  
486 application of utility values from other countries may be less accurate than country specific  
487 as highlighted in one of the reviewed studies (38). In addition, there is limited data on  
488 utility values for some DDs such as autism spectrum disorder (ASD) as noted in one of the  
489 reviewed studies (37). The valuation of child and adolescent outcome measures remains a  
490 challenging research area that requires further empirical evidence to inform best practice.

## 491 **Strengths and limitations**

492 A strength of this review is the application of the Arksey and O'Malley framework for  
493 scoping reviews which encourages collaborative engagement in the review process (22).  
494 This involved identifying and developing the overarching research question, and the key  
495 terms to identify relevant studies. A notable limitation of this review was the relatively few  
496 studies to review with a strong focus on caregiver interventions for children with NDDs  
497 which may restrict generalizability of the findings while highlighting important areas for

498 future research. While the search strategy was specific to NDDs, most papers focused on  
499 developmental disabilities all in high-income countries, evidently showing a literature gap.  
500 Costing and cost effectiveness data is highly context specific considering contextual factors  
501 that are important such as out of pocket costs, different health systems and different quality  
502 of life perspectives amongst others. This provides directions for future research across  
503 different contexts for example the African region.

## 504 Conclusion

505 This review mapped economic evaluations of caregiver interventions for children with DDs  
506 and highlighted the gap in evidence and methodological challenges. Whilst economic  
507 evaluation analyses in this area are scarce, emerging data from common DDs was promising  
508 in the quest for cost saving and cost-effective interventions that improve quality of life of  
509 both the child and parent/caregiver. Caregiver interventions are a promising avenue to  
510 strengthen access and reduce costs associated with health services for children with DDs.  
511 This review has provided an overview of evidence on DDs which is a growing priority  
512 across many areas of paediatrics. Future research should consider the development of  
513 appropriate outcome measures and measurement of all relevant costs for this heterogenous  
514 population. Prioritizing more economic evaluation studies in this area would inform  
515 decision-making on efficient resource allocation, promote inclusivity and equitable access  
516 of services for children with DDs within the health system.

517

## 518 Funding

519 This review was supported by funding from the National Institute for Health and Care  
520 Research (NIHR; SPARK project No.200842) using UK aid from the UK Government. The  
521 views expressed in this publication are those of the authors and not necessarily those of the  
522 NIHR or the Department of Health and Social Care.

## 523 Acknowledgements

524 CH receives support from the National Institute for Health and Care Research (NIHR)  
525 through the NIHR Global Health Research Group on Homelessness and Mental Health in  
526 Africa (NIHR134325) using UK aid from the UK Government. CH also receives support  
527 from Wellcome grants 222154/Z20/Z and 223615/Z/21/Z.

528 For the purpose of open access, the authors have applied a Creative Commons Attribution  
529 (CC BY) licence to any Author Accepted Author Manuscript version arising from this  
530 submission.

## 531 Supporting information

532 S1 Appendix: Search concepts and the corresponding key words used (concepts were  
533 combined using the Boolean operator "AND")

534 S2 Appendix: CHEERS 2022 Checklist AND Gates Reference Case Principles

535 S3 Appendix: Quality assessment of economic evaluations using the Drummond checklist

536

## 537 References

- 538 1. Lamsal R, Zwicker JD. Economic evaluation of interventions for children with  
539 neurodevelopmental disorders: opportunities and challenges. *Applied health economics and health*  
540 *policy*. 2017;15(6):763-72.
- 541 2. Olusanya BO, Davis AC, Wertlieb D, Boo N-Y, Nair M, Halpern R, et al. Developmental disabilities  
542 among children younger than 5 years in 195 countries and territories, 1990–2016: a systematic analysis  
543 for the Global Burden of Disease Study 2016. *The Lancet Global Health*. 2018;6(10):e1100-e21.
- 544 3. Francés L, Quintero J, Fernández A, Ruiz A, Caules J, Fillon G, et al. Current state of knowledge on  
545 the prevalence of neurodevelopmental disorders in childhood according to the DSM-5: a systematic  
546 review in accordance with the PRISMA criteria. *Child and adolescent psychiatry and mental health*.  
547 2022;16(1):27.
- 548 4. Morris-Rosendahl DJ, Crocq M-A. Neurodevelopmental disorders—the history and future of a  
549 diagnostic concept. *Dialogues in clinical neuroscience*. 2020;22(1):65-72.
- 550 5. Tekola B, Baheretibeb Y, Roth I, Tilahun D, Fekadu A, Hanlon C, et al. Challenges and  
551 opportunities to improve autism services in low-income countries: lessons from a situational analysis in  
552 Ethiopia. *Global mental health*. 2016;3.
- 553 6. Patel V, Kieling C, Maulik PK, Divan G. Improving access to care for children with mental  
554 disorders: a global perspective. *Archives of disease in childhood*. 2013;98(5):323-7.
- 555 7. Oono IP, Honey EJ, McConachie H. Parent-mediated early intervention for young children with  
556 autism spectrum disorders (ASD). *Evidence-Based Child Health: A Cochrane Review Journal*.  
557 2013;8(6):2380-479.
- 558 8. Dawson-Squibb J-J, Davids EL, Harrison AJ, Molony MA, de Vries PJ. Parent education and training  
559 for autism spectrum disorders: Scoping the evidence. *Autism*. 2020;24(1):7-25.
- 560 9. Shire SY, Gulsrud A, Kasari C. Increasing responsive parent-child interactions and joint  
561 engagement: Comparing the influence of parent-mediated intervention and parent psychoeducation.  
562 *Journal of autism and developmental disorders*. 2016;46:1737-47.
- 563 10. Barlow J. Systematic review of the effectiveness of parent education programmes in improving  
564 the behaviour of 3–7 year old children. Oxford: HSRU; 1997.
- 565 11. Elmquist M, Crowe B, Wattanawongwan S, Reichle J, Pierson L, Simacek J, et al. Caregiver-  
566 implemented AAC interventions for children with intellectual or developmental disabilities: A systematic  
567 review. *Review Journal of Autism and Developmental Disorders*. 2023:1-21.
- 568 12. Heidlage JK, Cunningham JE, Kaiser AP, Trivette CM, Barton EE, Frey JR, et al. The effects of  
569 parent-implemented language interventions on child linguistic outcomes: A meta-analysis. *Early*  
570 *Childhood Research Quarterly*. 2020;50:6-23.
- 571 13. Weitlauf AS, McPheeters ML, Peters B, Sathe N, Travis R, Aiello R, et al. Therapies for children  
572 with autism spectrum disorder: Behavioral interventions update. 2014.
- 573 14. Lord C, Elsabbagh M, Baird G, Veenstra-Vanderweele J. Autism spectrum disorder. *The lancet*.  
574 2018;392(10146):508-20.
- 575 15. Zechmeister I, Kilian R, McDaid D. Is it worth investing in mental health promotion and  
576 prevention of mental illness? A systematic review of the evidence from economic evaluations. *BMC public*  
577 *health*. 2008;8(1):1-11.
- 578 16. Le LK-D, Esturas AC, Mihalopoulos C, Chiotelis O, Bucholc J, Chatterton ML, et al. Cost-  
579 effectiveness evidence of mental health prevention and promotion interventions: A systematic review of  
580 economic evaluations. *PLoS medicine*. 2021;18(5):e1003606.
- 581 17. Haro JM, Ayuso-Mateos JL, Bitter I, Demotes-Mainard J, Leboyer M, Lewis SW, et al. ROAMER:  
582 roadmap for mental health research in Europe. *International journal of methods in psychiatric research*.  
583 2014;23(S1):1-14.
- 584 18. Knapp M, Wong G. Economics and mental health: the current scenario. *World Psychiatry*.  
585 2020;19(1):3-14.
- 586 19. Kularatna S, Jadambaa A, Senanayake S, Brain D, Hawker N, Kasparian NA, et al. The cost of  
587 neurodevelopmental disability: scoping review of economic evaluation methods. *ClinicoEconomics and*  
588 *Outcomes Research*. 2022:665-82.
- 589 20. Petrou S, Gray R. Methodological challenges posed by economic evaluations of early childhood  
590 intervention programmes. *Applied health economics and health policy*. 2005;4(3):175-81.
- 591 21. Ungar WJ. Challenges in health state valuation in paediatric economic evaluation.  
592 *Pharmacoeconomics*. 2011;29(8):641-52.
- 593 22. Arksey H, O'Malley L. Scoping studies: towards a methodological framework. *International*  
594 *journal of social research methodology*. 2005;8(1):19-32.

- 595 23. C. A. Endnote version X8. San Francisco, CA.: Clarivate Analytics. 2018; [  
596 24. Husereau D, Drummond M, Augustovski F, de Bekker-Grob E, Briggs AH, Carswell C, et al.  
597 Consolidated health economic evaluation reporting standards (CHEERS) 2022 explanation and  
598 elaboration: a report of the ISPOR CHEERS II Good Practices Task Force. *Value in Health*. 2022;25(1):10-  
599 31.
- 600 25. Claxton KP, Revill P, Sculpher M, Wilkinson T, Cairns J, Briggs A. The gates reference case for  
601 economic evaluation. 2014.
- 602 26. Drummond MF, Sculpher MJ, Claxton K, Stoddart GL, Torrance GW. *Methods for the economic*  
603 *evaluation of health care programmes*: Oxford university press; 2015.
- 604 27. Doran CM. Economic evaluation of interventions to treat opiate dependence: a review of the  
605 evidence. *Pharmacoeconomics*. 2008;26:371-93.
- 606 28. Scavenius C, Amilon A, Schultz EA. A Cost-effectiveness Analysis of Caring in Chaos—A Volunteer-  
607 delivered Parent Training Program in Denmark. *Journal of Child & Family Studies*. 2020;29(10):2836-49.
- 608 29. Sayal K, Taylor JA, Valentine A, Guo B, Sampson CJ, Sellman E, et al. Effectiveness and cost-  
609 effectiveness of a brief school-based group programme for parents of children at risk of ADHD: a cluster  
610 randomised controlled trial. *Child Care Health Dev*. 2016;42(4):521-33.
- 611 30. Segal L, Green J, Twizeyemariya A, Hudry K, Wan MW, Barbaro J, et al. Estimated Therapy Costs  
612 and Downstream Cost Consequences of iBASIS—Video Interaction to Promote Positive Parenting  
613 Intervention vs Usual Care Among Children Displaying Early Behavioral Signs of Autism in Australia.  
614 *JAMA Network Open*. 2023;6(4):e235847-e.
- 615 31. Charman T, Palmer M, Stringer D, Hallett V, Mueller J, Romeo R, et al. A Novel Group Parenting  
616 Intervention for Emotional and Behavioral Difficulties in Young Autistic Children: Autism Spectrum  
617 Treatment and Resilience (ASTAR): A Randomized Controlled Trial. *Journal of the American Academy of*  
618 *Child & Adolescent Psychiatry*. 2021;60(11):1404-18.
- 619 32. Byford S, Cary M, Barrett B, Aldred CR, Charman T, Howlin P, et al. Cost-effectiveness analysis of a  
620 communication-focused therapy for pre-school children with autism: results from a randomised  
621 controlled trial. *BMC psychiatry*. 2015;15:1-13.
- 622 33. Nystrand C, Feldman I, Enebrink P, Sampaio F. Cost-effectiveness analysis of parenting  
623 interventions for the prevention of behaviour problems in children. *PLoS One*. 2019;14(12):e0225503.
- 624 34. Tsiplova K, Jegathisawaran J, Mirenda P, Kalynchuk K, Colozzo P, Smith V, et al. Parent coaching  
625 intervention for children with suspected autism spectrum disorder: Cost analysis. *Research in Autism*  
626 *Spectrum Disorders*. 2022;93:101949.
- 627 35. Kuklinski MR, Small JW, Frey AJ, Bills K, Forness SR. Cost Effectiveness of School and Home  
628 Interventions for Students With Disruptive Behavior Problems. *Journal of Emotional and Behavioral*  
629 *Disorders*. 2023;31(4):272-84.
- 630 36. Nystrand C, Hultkrantz L, Vimefall E, Feldman I. Economic Return on Investment of Parent  
631 Training Programmes for the Prevention of Child Externalising Behaviour Problems. *Administration and*  
632 *policy in mental health*. 2020;47(2):300-15.
- 633 37. Penner M, Rayar M, Bashir N, Roberts SW, Hancock-Howard RL, Coyte PC. Cost-effectiveness  
634 analysis comparing pre-diagnosis autism spectrum disorder (ASD)-targeted intervention with Ontario's  
635 autism intervention program. *Journal of Autism and Developmental Disorders*. 2015;45:2833-47.
- 636 38. Nystrand C, Helander M, Enebrink P, Feldman I, Sampaio F. Adding the Coping Power Programme  
637 to parent management training: the cost-effectiveness of stacking interventions for children with  
638 disruptive behaviour disorders. *European child & adolescent psychiatry*. 2021;30(10):1603-14.
- 639 39. O'Farrelly C, Barker B, Watt H, Babalis D, Bakermans-Kranenburg M, Byford S, et al. A video-  
640 feedback parenting intervention to prevent enduring behaviour problems in at-risk children aged 12-36  
641 months: the Healthy Start, Happy Start RCT. *Health technology assessment (Winchester, England)*.  
642 2021;25(29):1.
- 643 40. Gibbard D, Coglan L, MacDonald J. Cost-effectiveness analysis of current practice and parent  
644 intervention for children under 3 years presenting with expressive language delay. *International Journal*  
645 *of Language & Communication Disorders*. 2004;39(2):229-44.
- 646 41. Tran JLA, Sheng R, Beaulieu A, Villodas M, McBurnett K, Piffner LJ, et al. Cost-Effectiveness of a  
647 Behavioral Psychosocial Treatment Integrated Across Home and School for Pediatric ADHD-Inattentive  
648 Type. *Administration and policy in mental health*. 2018;45(5):741-50.
- 649 42. Page TF, Pelham WE, 3rd, Fabiano GA, Greiner AR, Gnagy EM, Hart KC, et al. Comparative Cost  
650 Analysis of Sequential, Adaptive, Behavioral, Pharmacological, and Combined Treatments for Childhood  
651 ADHD. *Journal of clinical child and adolescent psychology : the official journal for the Society of Clinical*  
652 *Child and Adolescent Psychology, American Psychological Association, Division 53*. 2016;45(4):416-27.



- 653 43. Ferguson J, Dounavi K, Craig EA. The impact of a telehealth platform on ABA-based parent  
654 training targeting social communication in children with autism spectrum disorder. *Journal of*  
655 *Developmental & Physical Disabilities*. 2022;34(6):1089-120.
- 656 44. Sonuga-Barke EJ, Barton J, Daley D, Hutchings J, Maishman T, Raftery J, et al. A comparison of the  
657 clinical effectiveness and cost of specialised individually delivered parent training for preschool  
658 attention-deficit/hyperactivity disorder and a generic, group-based programme: a multi-centre,  
659 randomised controlled trial of the New Forest Parenting Programme versus Incredible Years. *European*  
660 *child & adolescent psychiatry*. 2018;27:797-809.
- 661 45. Jones DJ, Forehand R, Cuellar J, Parent J, Honeycutt A, Khavjou O, et al. Technology-enhanced  
662 program for child disruptive behavior disorders: Development and pilot randomized control trial. *Journal*  
663 *of Clinical Child & Adolescent Psychology*. 2014;43(1):88-101.
- 664 46. Royston R, Absoud M, Ambler G, Barnes J, Hunter R, Kyriakopoulos M, et al. Evaluation of adapted  
665 parent training for challenging behaviour in pre-school children with moderate to severe intellectual  
666 developmental disabilities: A randomised controlled trial. *Plos one*. 2024;19(8):e0306182.
- 667 47. Shimabukuro S, Oshio T, Endo T, Harada S, Yamashita Y, Tomoda A, et al. A pragmatic  
668 randomised controlled trial of the effectiveness and cost-effectiveness of Well Parent Japan in routine  
669 care in Japan: The training and nurturing support for mothers (TRANSFORM) study. *Journal of Child*  
670 *Psychology and Psychiatry*. 2024.
- 671 48. Tinelli M, Roddy A, Knapp M, Arango C, Mendez MA, Cusack J, et al. Economic analysis of early  
672 intervention for autistic children: findings from four case studies in England, Ireland, Italy, and Spain.  
673 *European Psychiatry*. 2023;66(1):e76.
- 674 49. Petrou S, Gray A. Economic evaluation alongside randomised controlled trials: design, conduct,  
675 analysis, and reporting. *Bmj*. 2011;342.
- 676 50. Kim DD, Wilkinson CL, Pope EF, Chambers JD, Cohen JT, Neumann PJ. The influence of time  
677 horizon on results of cost-effectiveness analyses. *Expert review of pharmacoeconomics & outcomes*  
678 *research*. 2017;17(6):615-23.
- 679 51. Suhrcke M, Pillas D, Selai C. Economic aspects of mental health in children and adolescents. *Social*  
680 *cohesion for mental well-being among adolescents Copenhagen: WHO Regional Office for Europe*. 2008.
- 681 52. Stabile M, Allin S. The economic costs of childhood disability. *The Future of children*.  
682 2012;22(1):65-96.
- 683 53. Sampaio F, Barendregt JJ, Feldman I, Lee YY, Sawyer MG, Dadds MR, et al. Population cost-  
684 effectiveness of the Triple P parenting programme for the treatment of conduct disorder: an economic  
685 modelling study. *European child & adolescent psychiatry*. 2018;27(7):933-44.
- 686 54. Grosse SD, Lollar DJ, Campbell VA, Chamie M. Disability and disability-adjusted life years: not the  
687 same. *Public Health Reports*. 2009;124(2):197-202.
- 688 55. Chisholm D, Healey A, Knapp M. QALYs and mental health care. *Social psychiatry and psychiatric*  
689 *epidemiology*. 1997;32:68-75.
- 690 56. Rowen D, Rivero-Arias O, Devlin N, Ratcliffe J. Review of valuation methods of preference-based  
691 measures of health for economic evaluation in child and adolescent populations: where are we now and  
692 where are we going? *Pharmacoeconomics*. 2020;38:325-40.
- 693 57. Mihalopoulos C, Vos T, Rapee RM, Pirkis J, Chatterton ML, Lee YC, et al. The population cost-  
694 effectiveness of a parenting intervention designed to prevent anxiety disorders in children. *Journal of*  
695 *child psychology and psychiatry, and allied disciplines*. 2015;56(9):1026-33.
- 696 58. Chen G, Ratcliffe J. A review of the development and application of generic multi-attribute utility  
697 instruments for paediatric populations. *Pharmacoeconomics*. 2015;33:1013-28.

698

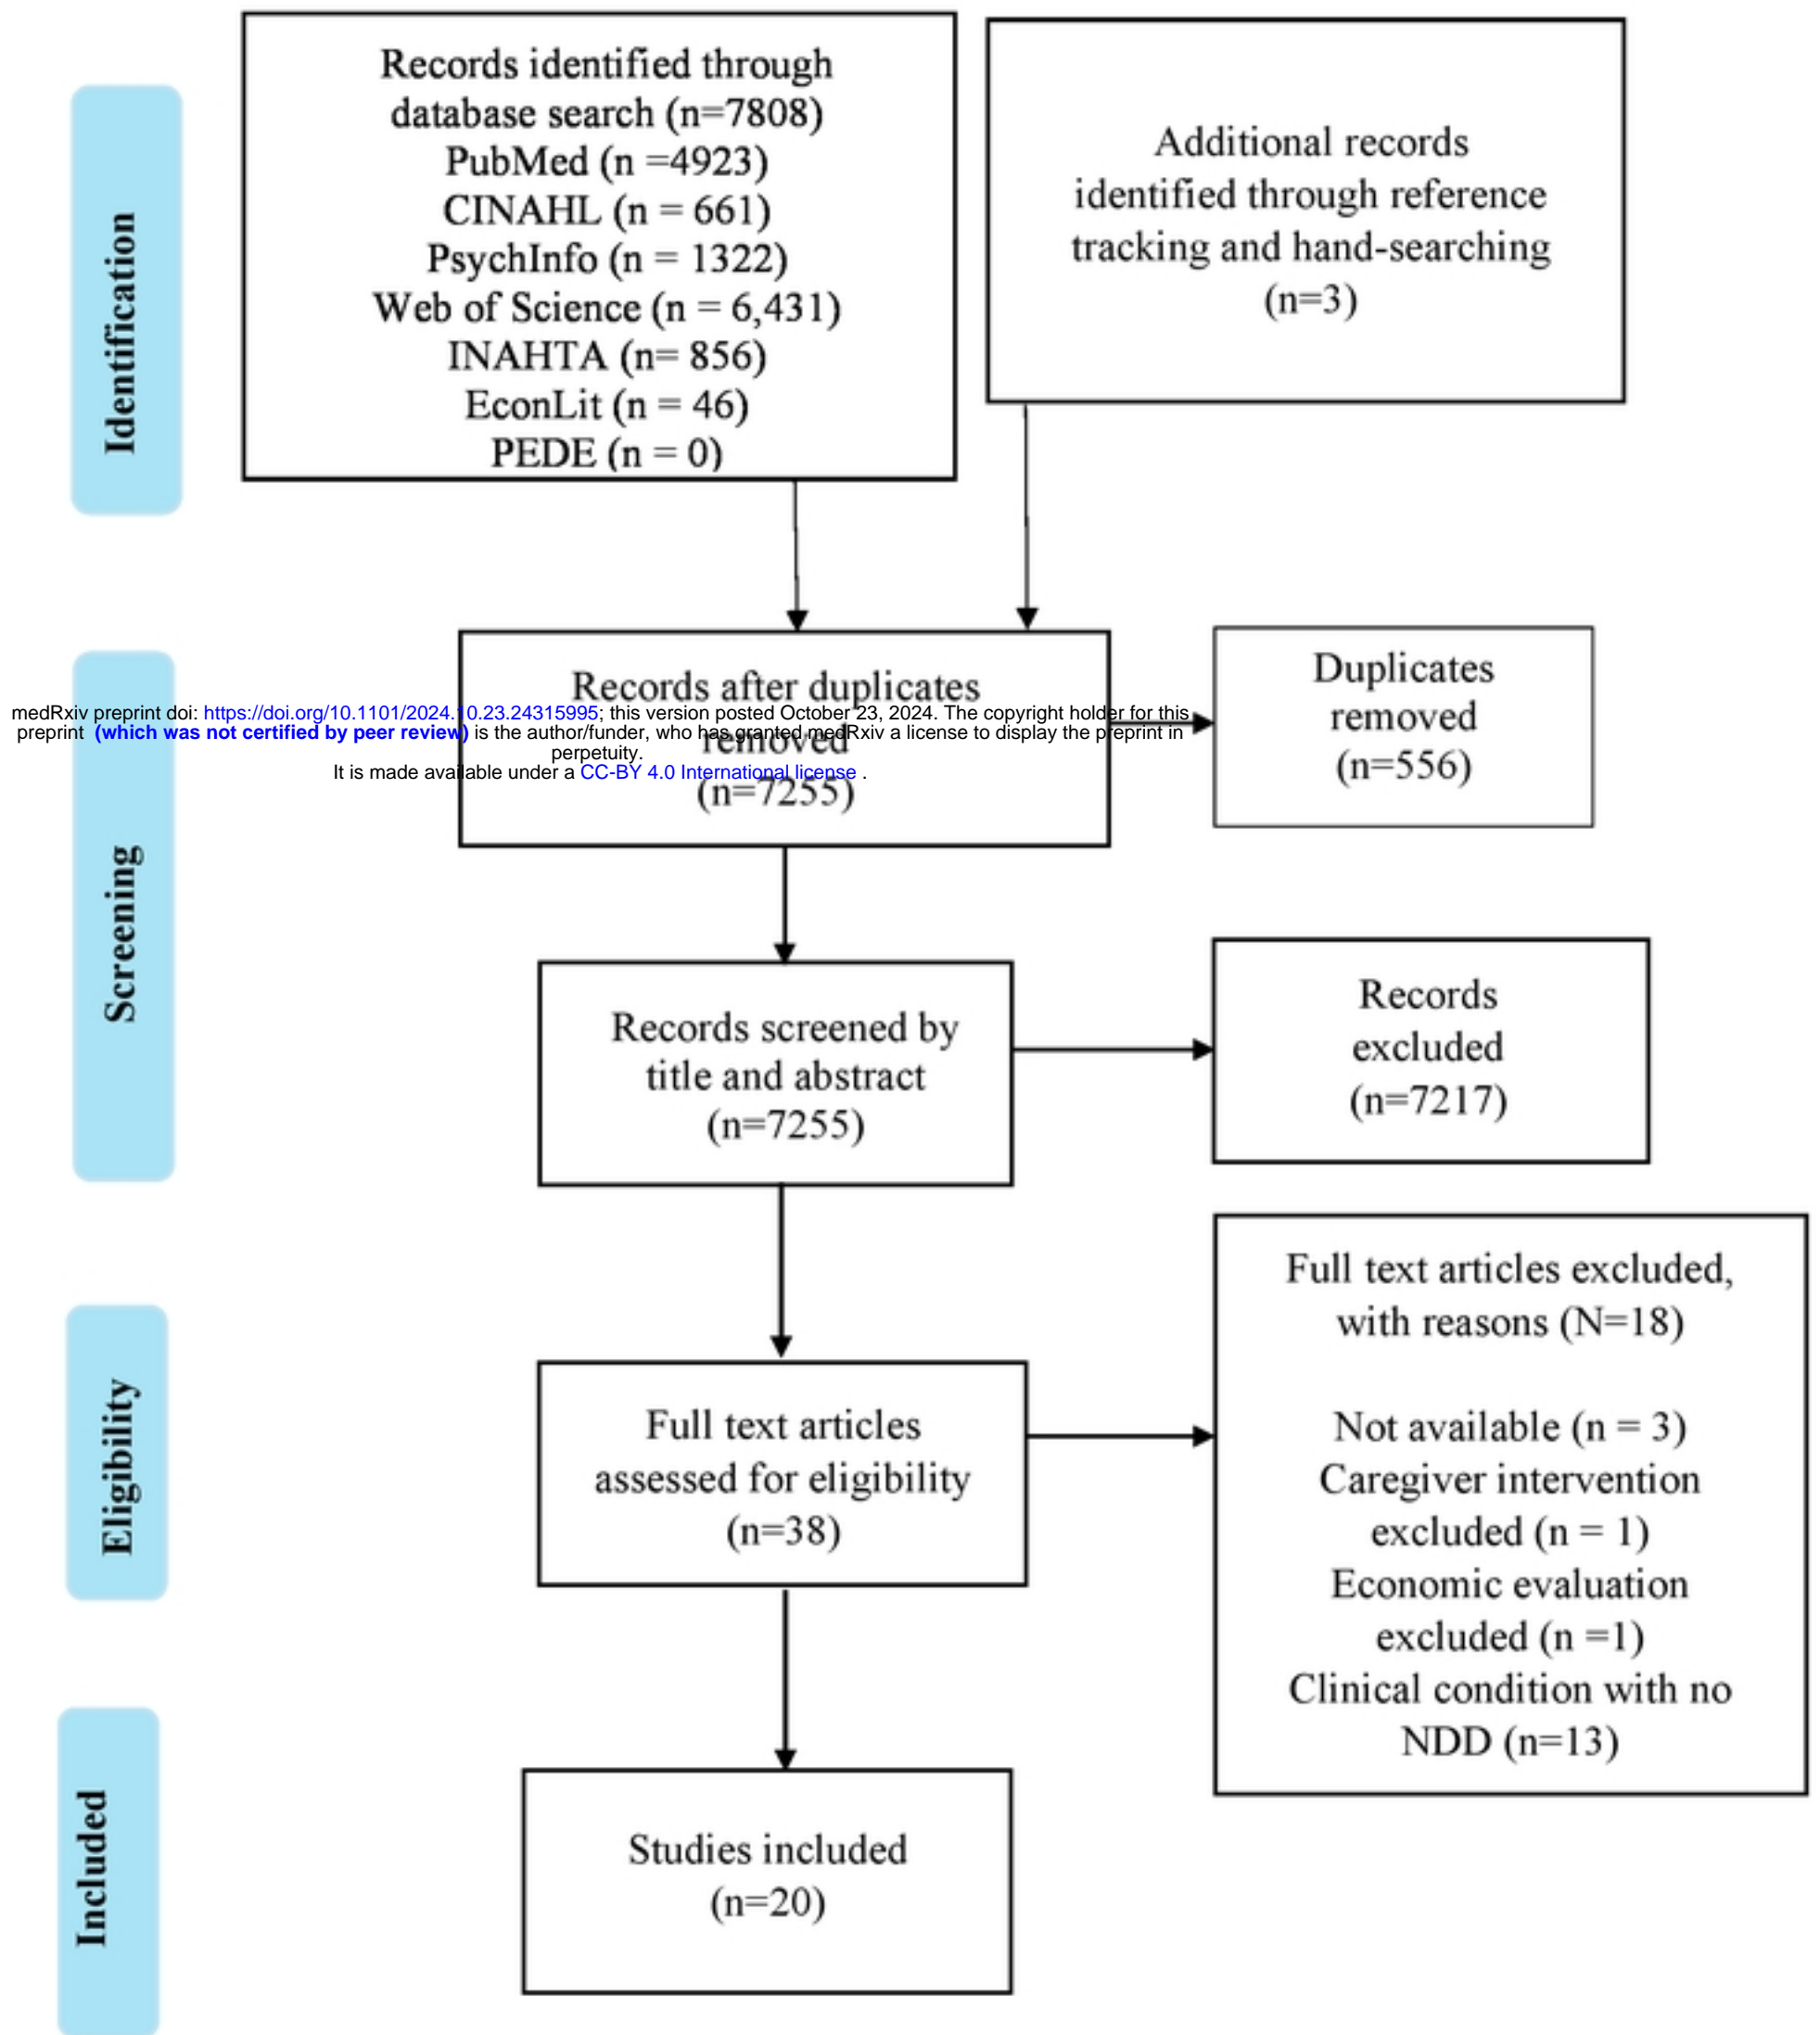

Figure 1: PRISMA flow chart of the study selection process
